# Supplementary material for: Molecular recognition and maturation of SOD1 by its evolutionarily destabilised cognate chaperone hCCS
Source: PLoS Biol. 2019 Feb 8;17(2):e3000141. doi: 10.1371/journal.pbio.3000141 (PMC6383938; doi:10.1371/journal.pbio.3000141)
Supplement: S1 Data — (XLSX) [file pbio.3000141.s014.xlsx]

## Sheet: 2D
wtSOD1-wthCCS		C57/146A SOD1-wt hCCS		C57/146A SOD1-A231G hCCS
Time (mins)	A220 (AU)	Time (mins)	A220 (AU)	Time (mins)	A220 (AU)
0	0	0	0	0	0
10	1064.2	10	935.96	10	48.409
37.483	1162.3	30.283	1013.2	30.233	57.011
64.883	1172	50.617	1033.3	50.533	63.925
1488.2	1137.1	1641.5	1172.9	297.18	145.42
1508.7	1139.5	1661.9	1175.4	317.45	151.39
1529	1142.8	1682.3	1185.8	337.78	156.57
2774.4	1109.6	2920.4	1160.3	3059.6	604.97
2794.7	1117	2940.8	1146.6	1799.9	505.88
2815	1118.8	2961.2	1144.3	3079.9	603.96
5719.5	1106.8	4363.3	1000.6	3100.2	607.76
5739.8	1095.3	4383.6	992.51	4290.9	778.35
5760.1	1089.8	4404.1	985.56	4311.3	775.76
6951	1223.1	5594.6	1055.5	4331.6	778.11
6971.2	1002.5	5615	920.72	5842.8	798.04

## Sheet: 5C
	mean	SEM
hCCS D1	10.162	3.41636
hCCS D2	12.874	3.29501
hCCS D12	22.66	5.78598
hCCS	69.236	3.34393
hCCS A231G	94.465	4.95065
hCCS R30A/K31A	40.216	5.19858
SOD1 C57/146A	6.712	4.17958
hCCS-SOD1 C57/146A	22.436	3.54818

## Sheet: S2D
	wild-type hCCS	Ala231Gly hCCS
Volume (ml)	A220nm (AU)	A220nm (AU)
0	0.390741	0.217156
0.005	0.236887	0.00666369
0.01	0.144068	-0.43102
0.015	0.075269	-0.606408
0.02	0.189291	-0.363464
0.025	0.242736	-0.316653
0.03	0.281905	-0.387403
0.035	0.367237	-0.209181
0.04	0.415701	0.00834901
0.045	0.447219	-0.0898983
0.05	0.431775	-0.332521
0.055	0.391828	-0.367584
0.06	0.399977	-0.175325
0.065	0.3634	-0.277142
0.07	0.31214	-0.507576
0.075	0.304464	-0.427613
0.08	0.255824	-0.187025
0.085	0.333094	-0.172769
0.09	0.353292	-0.481764
0.095	0.233848	-0.663443
0.1	0.177143	-0.562092
0.105	0.220835	-0.483972
0.11	0.194159	-0.708011
0.115	0.112553	-0.861065
0.12	0.0632595	-0.811885
0.125	0.114175	-0.873688
0.13	0.0922721	-1.0791
0.135	0.00126275	-1.29007
0.14	0.0404071	-1.11185
0.145	0.00117704	-1.04842
0.15	-0.173253	-1.32171
0.155	-0.261518	-1.63302
0.16	-0.210971	-1.70426
0.165	-0.161114	-1.82266
0.17	-0.254588	-2.03588
0.175	-0.403269	-2.24444
0.18	-0.41294	-2.24441
0.185	-0.418712	-2.2564
0.19	-0.449315	-2.42518
0.195	-0.550254	-2.63847
0.2	-0.638731	-2.72073
0.205	-0.68311	-2.77767
0.21	-0.775733	-2.98079
0.215	-0.946286	-3.0628
0.22	-1.01154	-2.78735
0.225	-1.00197	-2.59163
0.23	-0.964192	-2.96172
0.235	-1.02744	-3.31962
0.24	-1.12584	-3.19711
0.245	-1.13352	-2.98742
0.25	-1.12947	-3.01269
0.255	-1.22544	-3.14626
0.26	-1.15471	-2.84792
0.265	-1.07941	-2.55977
0.27	-1.06529	-2.64514
0.275	-1.127	-2.74327
0.28	-1.09836	-2.3682
0.285	-0.895399	-2.01174
0.29	-0.758228	-2.11346
0.295	-0.832808	-2.27874
0.3	-0.779491	-1.8884
0.305	-0.667154	-1.64726
0.31	-0.585192	-1.77209
0.315	-0.614538	-1.67674
0.32	-0.603423	-1.36676
0.325	-0.454934	-1.32055
0.33	-0.354243	-1.44903
0.335	-0.388843	-1.57922
0.34	-0.372822	-1.39357
0.345	-0.334672	-1.21377
0.35	-0.317905	-1.30104
0.355	-0.294128	-1.29938
0.36	-0.289086	-1.1494
0.365	-0.166657	-0.878769
0.37	-0.0216945	-0.85216
0.375	-0.0857481	-0.999546
0.38	-0.0996442	-0.917579
0.385	0.0448891	-0.695518
0.39	0.188823	-0.836792
0.395	0.177626	-1.01723
0.4	0.0988863	-0.871888
0.405	0.109573	-0.572951
0.41	0.11837	-0.56686
0.415	0.0368247	-0.720368
0.42	0.0728821	-0.680637
0.425	0.109726	-0.651156
0.43	0.135503	-0.802852
0.435	0.111004	-0.949091
0.44	0.0957216	-0.82219
0.445	0.24107	-0.60866
0.45	0.284965	-0.691937
0.455	0.211861	-0.829649
0.46	0.180881	-0.523899
0.465	0.18862	-0.187236
0.47	0.200152	-0.352353
0.475	0.165859	-0.722627
0.48	0.104434	-0.699646
0.485	0.214445	-0.433752
0.49	0.329818	-0.46486
0.495	0.292234	-0.708504
0.5	0.293951	-0.650032
0.505	0.353581	-0.442462
0.51	0.386035	-0.524627
0.515	0.268127	-0.749592
0.52	0.107562	-0.651029
0.525	0.103291	-0.279233
0.53	0.181781	-0.33779
0.535	0.157993	-0.619677
0.54	0.201348	-0.507566
0.545	0.252861	-0.169041
0.55	0.302592	-0.315769
0.555	0.300328	-0.649258
0.56	0.22476	-0.558911
0.565	0.260247	-0.264559
0.57	0.307373	-0.267549
0.575	0.267698	-0.502086
0.58	0.292054	-0.333767
0.585	0.334741	-0.0295352
0.59	0.406731	-0.132316
0.595	0.402336	-0.301847
0.6	0.27624	-0.216623
0.605	0.276925	-0.034121
0.61	0.301019	-0.150672
0.615	0.191804	-0.413697
0.62	0.186418	-0.477079
0.625	0.295943	-0.332374
0.63	0.369652	-0.211842
0.635	0.321376	-0.30042
0.64	0.283798	-0.400282
0.645	0.337879	-0.334774
0.65	0.405923	-0.368793
0.655	0.34216	-0.552936
0.66	0.323317	-0.434919
0.665	0.348421	-0.233868
0.67	0.397064	-0.200518
0.675	0.310891	-0.321409
0.68	0.126693	-0.304152
0.685	0.144545	-0.188688
0.69	0.301265	-0.226783
0.695	0.230753	-0.377587
0.7	0.171339	-0.284842
0.705	0.2593	-0.144488
0.71	0.352754	-0.168496
0.715	0.346425	-0.298472
0.72	0.269583	-0.385717
0.725	0.306474	-0.214215
0.73	0.308432	-0.164137
0.735	0.225577	-0.355925
0.74	0.260277	-0.392829
0.745	0.391962	-0.180799
0.75	0.457971	-0.158744
0.755	0.414359	-0.371596
0.76	0.29199	-0.42165
0.765	0.251285	-0.209155
0.77	0.249156	-0.108237
0.775	0.245282	-0.268824
0.78	0.281963	-0.353453
0.785	0.327907	-0.215962
0.79	0.416566	-0.195452
0.795	0.421169	-0.321611
0.8	0.240493	-0.436756
0.805	0.257675	-0.248366
0.81	0.371857	-0.199529
0.815	0.331056	-0.387972
0.82	0.298384	-0.434646
0.825	0.282574	-0.227081
0.83	0.307277	-0.151199
0.835	0.248791	-0.299367
0.84	0.148783	-0.386038
0.845	0.211239	-0.247578
0.85	0.341607	-0.1689
0.855	0.397812	-0.263301
0.86	0.325977	-0.245006
0.865	0.292531	-0.069931
0.87	0.309694	-0.0910244
0.875	0.283912	-0.244519
0.88	0.2263	-0.273626
0.885	0.331369	-0.0695457
0.89	0.408378	0.0486331
0.895	0.328502	-0.145433
0.9	0.270707	-0.175125
0.905	0.196154	-0.0954421
0.91	0.217543	-0.094982
0.915	0.264662	-0.329956
0.92	0.244667	-0.383597
0.925	0.271953	-0.0806064
0.93	0.374439	-0.00381509
0.935	0.442643	-0.286037
0.94	0.48556	-0.435971
0.945	0.42478	-0.122819
0.95	0.309737	0.0451358
0.955	0.245227	-0.191542
0.96	0.181627	-0.385631
0.965	0.306344	-0.120696
0.97	0.41973	0.0959862
0.975	0.394322	-0.105877
0.98	0.371156	-0.219923
0.985	0.38616	-0.0624173
0.99	0.446232	0.0862339
0.995	0.48512	0.0581637
1	0.42359	-0.0337238
1.005	0.405873	-0.0275746
1.01	0.421289	0.0742
1.015	0.372375	-0.0463891
1.02	0.360378	-0.158973
1.025	0.301793	-0.0905138
1.03	0.30734	0.0590141
1.035	0.296023	0.0535895
1.04	0.251793	0.0114672
1.045	0.313225	0.1102
1.05	0.509395	0.209441
1.055	0.598437	0.0424148
1.06	0.438598	-0.0444108
1.065	0.339432	0.145751
1.07	0.429513	0.324498
1.075	0.453707	0.269715
1.08	0.297182	0.0565037
1.085	0.244905	0.0408445
1.09	0.40637	0.112759
1.095	0.451649	-0.0300745
1.1	0.376878	-0.0874894
1.105	0.30019	0.221343
1.11	0.369876	0.422417
1.115	0.478905	0.272323
1.12	0.442534	-0.0953068
1.125	0.43628	-0.0733216
1.13	0.425408	0.111114
1.135	0.315124	0.0628775
1.14	0.241907	-0.0774583
1.145	0.291395	-0.0575789
1.15	0.435565	0.122717
1.155	0.498935	0.108823
1.16	0.401067	-0.0202053
1.165	0.326116	0.0634228
1.17	0.324563	0.183856
1.175	0.302282	0.0514769
1.18	0.302024	-0.101214
1.185	0.318715	-0.0401524
1.19	0.375304	0.119579
1.195	0.444902	0.0818827
1.2	0.33313	-0.0181759
1.205	0.248956	0.0864915
1.21	0.278443	0.3126
1.215	0.300542	0.210578
1.22	0.25349	0.00423444
1.225	0.271344	0.0673505
1.23	0.339968	0.278688
1.235	0.369816	0.199315
1.24	0.292071	-0.122091
1.245	0.275804	-0.0182202
1.25	0.333709	0.24183
1.255	0.39554	0.11223
1.26	0.455937	0.007091
1.265	0.362243	0.174431
1.27	0.337475	0.340585
1.275	0.400036	0.220856
1.28	0.385679	0.0441514
1.285	0.363899	0.220919
1.29	0.403683	0.440114
1.295	0.397657	0.122787
1.3	0.415802	-0.164593
1.305	0.396602	-0.00840934
1.31	0.467024	0.205544
1.315	0.586173	0.0628348
1.32	0.49098	-0.143134
1.325	0.369292	0.0522899
1.33	0.402454	0.400547
1.335	0.459521	0.267369
1.34	0.469814	-0.0826459
1.345	0.447152	-0.0638341
1.35	0.478523	0.228762
1.355	0.535523	0.1895
1.36	0.422175	-0.0430817
1.365	0.359122	0.0825761
1.37	0.442923	0.326651
1.375	0.512059	0.19193
1.38	0.489723	-0.00199462
1.385	0.44746	0.0327925
1.39	0.543883	0.181474
1.395	0.64821	0.132065
1.4	0.538268	-0.13291
1.405	0.446357	-0.0811674
1.41	0.438661	0.242301
1.415	0.388468	0.215797
1.42	0.34927	-0.0152728
1.425	0.378267	0.0437137
1.43	0.47201	0.251696
1.435	0.522921	0.188929
1.44	0.438552	-0.0228973
1.445	0.399162	0.0263548
1.45	0.472295	0.275918
1.455	0.463412	0.334331
1.46	0.469412	0.315163
1.465	0.502941	0.334062
1.47	0.545423	0.368518
1.475	0.584095	0.23831
1.48	0.509507	-0.0461464
1.485	0.577516	0.0676115
1.49	0.709314	0.481002
1.495	0.710188	0.595929
1.5	0.691191	0.444593
1.505	0.718505	0.521163
1.51	0.818861	0.758279
1.515	0.959321	0.827305
1.52	0.958566	0.659036
1.525	0.913464	0.775966
1.53	0.989981	1.08873
1.535	1.0892	1.13855
1.54	1.10583	1.0051
1.545	1.05145	1.08786
1.55	1.18393	1.40094
1.555	1.25771	1.48561
1.56	1.14472	1.28289
1.565	1.03603	1.24261
1.57	1.04544	1.42035
1.575	1.03905	1.36939
1.58	1.07175	1.21698
1.585	1.04734	1.24159
1.59	1.00745	1.33069
1.595	1.06981	1.28125
1.6	1.02931	1.07277
1.605	0.972858	1.04234
1.61	0.959339	1.2133
1.615	0.971621	1.10122
1.62	0.937783	0.882746
1.625	0.841872	0.898991
1.63	0.813592	1.04536
1.635	0.884565	1.01688
1.64	0.836193	0.691271
1.645	0.812128	0.611518
1.65	0.773677	0.883339
1.655	0.736589	0.949098
1.66	0.712252	0.73809
1.665	0.694221	0.72843
1.67	0.754506	0.84977
1.675	0.841991	0.66988
1.68	0.7302	0.329647
1.685	0.609262	0.366057
1.69	0.606699	0.694921
1.695	0.599689	0.761675
1.7	0.626462	0.547175
1.705	0.629259	0.391661
1.71	0.692729	0.511006
1.715	0.705093	0.645383
1.72	0.630588	0.478616
1.725	0.596657	0.426839
1.73	0.583353	0.671647
1.735	0.531966	0.701937
1.74	0.56317	0.470394
1.745	0.567547	0.253033
1.75	0.625994	0.33438
1.755	0.696783	0.341582
1.76	0.557376	0.192602
1.765	0.40287	0.190634
1.77	0.436364	0.498347
1.775	0.504221	0.646576
1.78	0.544522	0.625698
1.785	0.477272	0.519714
1.79	0.474026	0.592645
1.795	0.56912	0.609575
1.8	0.591317	0.423963
1.805	0.547012	0.416966
1.81	0.513515	0.685516
1.815	0.501131	0.737785
1.82	0.502894	0.478699
1.825	0.430412	0.219359
1.83	0.430598	0.352056
1.835	0.477433	0.557828
1.84	0.463151	0.486113
1.845	0.475631	0.454058
1.85	0.495853	0.600123
1.855	0.472026	0.615042
1.86	0.539436	0.377884
1.865	0.46657	0.24581
1.87	0.428446	0.383087
1.875	0.534974	0.569373
1.88	0.488396	0.454153
1.885	0.421379	0.436589
1.89	0.46991	0.710864
1.895	0.524046	0.625663
1.9	0.646714	0.245918
1.905	0.623886	0.137776
1.91	0.573972	0.406953
1.915	0.631505	0.58299
1.92	0.650497	0.362294
1.925	0.584305	0.175189
1.93	0.504539	0.364344
1.935	0.498112	0.53556
1.94	0.534726	0.409085
1.945	0.530475	0.262077
1.95	0.510325	0.452451
1.955	0.554973	0.644729
1.96	0.4826	0.440391
1.965	0.421834	0.164366
1.97	0.420496	0.281248
1.975	0.466947	0.46772
1.98	0.538533	0.272414
1.985	0.52322	0.0561355
1.99	0.48817	0.282368
1.995	0.567563	0.616834
2	0.592677	0.551961
2.005	0.546941	0.288669
2.01	0.454079	0.296411
2.015	0.447503	0.511276
2.02	0.507125	0.438236
2.025	0.501146	0.115782
2.03	0.497454	0.182998
2.035	0.593064	0.576838
2.04	0.530102	0.515367
2.045	0.448157	0.277038
2.05	0.462234	0.41738
2.055	0.489045	0.597893
2.06	0.498484	0.456497
2.065	0.406788	0.334763
2.07	0.448293	0.512313
2.075	0.549975	0.799536
2.08	0.507396	0.726843
2.085	0.415079	0.530801
2.09	0.424535	0.625799
2.095	0.387454	0.739639
2.1	0.389581	0.582073
2.105	0.344689	0.375993
2.11	0.420981	0.428361
2.115	0.55971	0.614497
2.12	0.615352	0.5287
2.125	0.555979	0.395977
2.13	0.529214	0.570165
2.135	0.531799	0.710753
2.14	0.65931	0.471225
2.145	0.684243	0.252898
2.15	0.643425	0.400071
2.155	0.596748	0.693856
2.16	0.527376	0.547519
2.165	0.506515	0.285984
2.17	0.531335	0.31942
2.175	0.566843	0.546679
2.18	0.599891	0.560278
2.185	0.528144	0.437478
2.19	0.471907	0.593869
2.195	0.592094	0.872732
2.2	0.610677	0.68581
2.205	0.439516	0.322854
2.21	0.360202	0.487632
2.215	0.502448	0.755479
2.22	0.641242	0.686368
2.225	0.574868	0.444734
2.23	0.560788	0.503434
2.235	0.694342	0.877875
2.24	0.708099	0.923136
2.245	0.622425	0.731488
2.25	0.545743	0.741483
2.255	0.587338	0.936763
2.26	0.622003	0.914813
2.265	0.556749	0.86711
2.27	0.574017	1.02141
2.275	0.691907	1.33843
2.28	0.683567	1.43657
2.285	0.690176	1.38356
2.29	0.758071	1.44728
2.295	0.855359	1.65713
2.3	0.916754	1.77636
2.305	0.803761	1.55714
2.31	0.675304	1.45382
2.315	0.741718	1.69822
2.32	0.863433	1.69752
2.325	0.95464	1.46433
2.33	0.962999	1.47763
2.335	0.985637	1.633
2.34	1.0308	1.50203
2.345	0.985568	1.30068
2.35	0.938311	1.12317
2.355	1.05633	1.14848
2.36	1.15297	1.05642
2.365	1.24732	0.917384
2.37	1.2702	0.999915
2.375	1.27406	1.17407
2.38	1.46181	1.09468
2.385	1.55068	0.864237
2.39	1.5303	1.05687
2.395	1.59531	1.50965
2.4	1.70353	1.58377
2.405	1.80457	1.32257
2.41	1.88613	1.3336
2.415	2.02378	1.49314
2.42	2.18733	1.47422
2.425	2.22647	1.39223
2.43	2.23335	1.59909
2.435	2.39668	1.9503
2.44	2.41244	2.02549
2.445	2.32763	1.93236
2.45	2.3485	2.13607
2.455	2.49294	2.62378
2.46	2.67531	3.11104
2.465	2.79063	3.49199
2.47	2.86796	4.14512
2.475	3.02481	5.3838
2.48	3.28201	6.84069
2.485	3.65691	8.68211
2.49	4.02003	11.4759
2.495	4.46726	15.5457
2.5	5.22763	21.2093
2.505	6.19384	29.3531
2.51	7.62719	41.3192
2.515	10.1005	58.3484
2.52	14.0492	81.1626
2.525	20.4164	111.235
2.53	30.833	149.977
2.535	47.6195	197.305
2.54	73.5687	251.396
2.545	111.016	309.428
2.55	160.64	368.536
2.555	220.203	425.025
2.56	283.881	474.749
2.565	344.476	514.695
2.57	396.354	544.506
2.575	436.847	563.92
2.58	465.71	572.341
2.585	483.322	569.961
2.59	491.43	559.773
2.595	492.437	543.945
2.6	487.371	522.568
2.605	477.264	496.461
2.61	463.206	468.282
2.615	446.665	439.325
2.62	428.543	409.795
2.625	409.074	380.004
2.63	388.826	351.349
2.635	368.704	324.672
2.64	349.012	299.103
2.645	329.553	274.617
2.65	310.438	251.989
2.655	292.303	231.494
2.66	275.329	212.452
2.665	258.829	194.52
2.67	242.937	178.222
2.675	227.877	163.804
2.68	213.603	150.497
2.685	200.09	137.792
2.69	187.251	126.335
2.695	175.299	116.375
2.7	164.251	107.312
2.705	153.785	98.6264
2.71	143.942	90.7355
2.715	134.884	84.0011
2.72	126.486	77.8936
2.725	118.633	71.9171
2.73	111.202	66.5868
2.735	104.332	62.0169
2.74	98.0565	57.9674
2.745	92.0674	53.8642
2.75	86.4719	50.0605
2.755	81.411	46.9401
2.76	76.7131	43.9611
2.765	72.2649	40.8619
2.77	68.0482	38.1082
2.775	64.1764	35.9118
2.78	60.649	33.9864
2.785	57.2058	31.8869
2.79	53.8953	29.8418
2.795	50.9127	28.3086
2.8	48.278	26.7991
2.805	45.7128	24.9874
2.81	43.1526	23.358
2.815	40.7553	22.2101
2.82	38.698	21.2111
2.825	36.735	19.9404
2.83	34.7785	18.5246
2.835	32.9893	17.5531
2.84	31.4031	16.702
2.845	29.8568	15.8119
2.85	28.3417	14.9572
2.855	26.9772	14.3958
2.86	25.7825	13.9168
2.865	24.6109	13.0902
2.87	23.4996	12.2306
2.875	22.5304	11.8278
2.88	21.5958	11.5325
2.885	20.7643	11.0536
2.89	19.9028	10.5361
2.895	19.0546	10.2862
2.9	18.376	10.0621
2.905	17.6887	9.57207
2.91	16.9486	9.06757
2.915	16.3069	8.98964
2.92	15.819	8.86013
2.925	15.3466	8.40392
2.93	14.7442	7.93355
2.935	14.1127	7.87414
2.94	13.6964	7.86577
2.945	13.2731	7.42756
2.95	12.79	6.8769
2.955	12.3676	6.80724
2.96	12.0661	6.80405
2.965	11.7025	6.46663
2.97	11.2064	6.09118
2.975	10.8321	6.07746
2.98	10.672	6.07824
2.985	10.3357	5.64942
2.99	9.88228	5.22442
2.995	9.5903	5.25709
3	9.37628	5.38416
3.005	9.21077	5.23169
3.01	8.97101	4.85291
3.015	8.69156	4.73345
3.02	8.42674	4.81459
3.025	8.24205	4.62203
3.03	8.04691	4.15299
3.035	7.82572	4.10202
3.04	7.66156	4.28574
3.045	7.59882	4.13842
3.05	7.35842	3.84644
3.055	7.11011	3.7532
3.06	7.03984	3.9286
3.065	6.91044	3.80862
3.07	6.69612	3.47083
3.075	6.48182	3.45658
3.08	6.32629	3.75473
3.085	6.32314	3.7805
3.09	6.27164	3.59322
3.095	6.01829	3.60623
3.1	5.90314	3.76144
3.105	5.82247	3.58392
3.11	5.65112	3.29196
3.115	5.47245	3.23417
3.12	5.41347	3.34613
3.125	5.42933	3.26962
3.13	5.28599	3.09217
3.135	5.13303	2.93481
3.14	5.14774	3.10546
3.145	5.11071	3.1887
3.15	4.92079	3.07322
3.155	4.72921	3.05182
3.16	4.61613	3.06363
3.165	4.61312	2.90673
3.17	4.51783	2.84509
3.175	4.27814	2.81686
3.18	4.29124	2.89796
3.185	4.39056	2.74807
3.19	4.32129	2.46496
3.195	4.1635	2.35795
3.2	4.07815	2.50507
3.205	4.09182	2.65619
3.21	4.06089	2.46513
3.215	3.90226	2.35162
3.22	3.8968	2.44709
3.225	3.90134	2.5048
3.23	3.86392	2.27996
3.235	3.80476	2.31359
3.24	3.77405	2.54795
3.245	3.78464	2.59089
3.25	3.72361	2.39628
3.255	3.60915	2.29835
3.26	3.61256	2.51526
3.265	3.56148	2.5232
3.27	3.44435	2.31112
3.275	3.33649	2.30279
3.28	3.33199	2.56139
3.285	3.3811	2.70012
3.29	3.35747	2.56689
3.295	3.26187	2.41777
3.3	3.31283	2.59143
3.305	3.36053	2.76008
3.31	3.25396	2.57064
3.315	3.17997	2.41048
3.32	3.20233	2.47973
3.325	3.30771	2.53193
3.33	3.23571	2.40297
3.335	3.12427	2.40108
3.34	3.15497	2.76557
3.345	3.17302	2.99272
3.35	3.08078	2.7272
3.355	2.97122	2.56151
3.36	2.91475	2.73293
3.365	3.00993	2.74788
3.37	3.06904	2.47452
3.375	3.00172	2.37043
3.38	2.98384	2.61068
3.385	3.07135	2.65981
3.39	3.15393	2.43001
3.395	3.13881	2.29483
3.4	3.03595	2.51922
3.405	2.98918	2.63858
3.41	2.88492	2.41867
3.415	2.77969	2.22193
3.42	2.83892	2.32316
3.425	2.96168	2.41473
3.43	2.96595	2.28917
3.435	2.86241	2.28095
3.44	2.74972	2.38032
3.445	2.74578	2.43547
3.45	2.70661	2.17881
3.455	2.60156	2.04059
3.46	2.59323	2.26828
3.465	2.61602	2.35233
3.47	2.63335	2.19491
3.475	2.57817	2.10024
3.48	2.51601	2.09486
3.485	2.55049	2.13813
3.49	2.5682	1.9643
3.495	2.50089	1.76375
3.5	2.4452	1.98931
3.505	2.38256	2.20638
3.51	2.32759	2.02506
3.515	2.26725	1.69686
3.52	2.1402	1.73172
3.525	2.16395	1.8827
3.53	2.2069	1.81938
3.535	2.11046	1.68711
3.54	2.08284	1.89803
3.545	2.14126	2.04205
3.55	2.18571	1.90363
3.555	2.17508	1.86787
3.56	2.12146	2.03603
3.565	2.17777	2.15941
3.57	2.17158	2.03497
3.575	2.06524	1.88722
3.58	2.02844	2.10221
3.585	2.05004	2.3109
3.59	2.13444	2.24691
3.595	2.20172	2.14954
3.6	2.18565	2.27975
3.605	2.25276	2.40508
3.61	2.28007	2.31336
3.615	2.19674	2.16305
3.62	2.11585	2.42436
3.625	2.13506	2.63087
3.63	2.17908	2.49209
3.635	2.11473	2.33023
3.64	2.10072	2.5513
3.645	2.25141	2.77696
3.65	2.39654	2.5647
3.655	2.32656	2.23842
3.66	2.29817	2.3879
3.665	2.36722	2.5461
3.67	2.4117	2.34607
3.675	2.3602	2.29697
3.68	2.25737	2.60301
3.685	2.36265	2.82518
3.69	2.40348	2.69052
3.695	2.29881	2.42171
3.7	2.186	2.53536
3.705	2.21256	2.73908
3.71	2.23451	2.68732
3.715	2.2898	2.49622
3.72	2.27963	2.50885
3.725	2.36104	2.63873
3.73	2.35272	2.69559
3.735	2.24929	2.57377
3.74	2.22177	2.69273
3.745	2.2821	2.78401
3.75	2.36972	2.45617
3.755	2.35645	2.17104
3.76	2.29046	2.25089
3.765	2.35229	2.50017
3.77	2.35075	2.50978
3.775	2.30138	2.39993
3.78	2.34866	2.59188
3.785	2.43723	2.79775
3.79	2.47028	2.60677
3.795	2.47192	2.34266
3.8	2.39824	2.40457
3.805	2.41769	2.63486

## Sheet: S2E
30 minutes
Time (s)	No inhibition	Complete inhibition	A231G hCCS-SOD1	Wild-type hCCS-SOD1	R104A hCCS-SOD1	R104H hCCS-SOD1
0	0.258567	0.229133	0.2574	0.244667	0.244167	0.244167
2	0.2665	0.2286	0.264633	0.246233	0.246367	0.2456
4	0.274633	0.228967	0.2713	0.2481	0.247967	0.248067
6	0.282767	0.228867	0.278	0.250133	0.249933	0.250333
8	0.290267	0.2288	0.284667	0.252333	0.252233	0.252833
10	0.298133	0.228767	0.291	0.254333	0.254633	0.2551
12	0.305533	0.228467	0.297233	0.2565	0.257967	0.257567
14	0.312367	0.2284	0.302933	0.261767	0.258967	0.26
16	0.318967	0.228467	0.308533	0.2619	0.261233	0.262533
18	0.325633	0.228467	0.313667	0.263467	0.263333	0.264367
20	0.331333	0.228367	0.3186	0.265467	0.2654	0.266733
60 minutes
Time (s)	No inhibition	Complete inhibition	A231G hCCS-SOD1	Wild-type hCCS-SOD1	R104A hCCS-SOD1	R104H hCCS-SOD1
0	0.258567	0.229133	0.259967	0.244233	0.243567	0.243033
2	0.2665	0.2286	0.265333	0.246233	0.244667	0.244333
4	0.274633	0.228967	0.270533	0.248167	0.246	0.246267
6	0.282767	0.228867	0.275867	0.2498	0.2476	0.2485
8	0.290267	0.2288	0.2813	0.252267	0.249567	0.2507
10	0.298133	0.228767	0.286833	0.255133	0.251233	0.2528
12	0.305533	0.228467	0.2918	0.257267	0.253133	0.254333
14	0.312367	0.2284	0.2967	0.2605	0.2551	0.2563
16	0.318967	0.228467	0.3012	0.2634	0.2588	0.259167
18	0.325633	0.228467	0.305767	0.262333	0.2599	0.260633
20	0.331333	0.228367	0.310333	0.264367	0.2609	0.262633

## Sheet: S3B
Volume (ml)	S-S hCCS D2-SOD1 C57,146A	Volume (ml)	S-H hCCS D2-SOD1 C57,146A
0	-0.03	0	0.403
0.0150962	-0.028	0.0186195	0.16
0.0301923	0.195	0.037239	1.603
0.0452885	6.904	0.0558585	11.175
0.0603847	15.593	0.074478	17.288
0.0754808	16.719	0.0930975	13.677
0.090577	13.52	0.111717	9.671
0.105673	10.458	0.130336	7.519
0.120769	8.362	0.148956	5.815
0.135865	6.932	0.167575	4.869
0.150962	5.84	0.186195	4.22
0.166058	5.024	0.204814	3.709
0.181154	4.473	0.223434	3.178
0.19625	3.986	0.242053	2.81
0.211346	3.551	0.260673	2.492
0.226442	3.249	0.279292	2.26
0.241539	2.943	0.297912	2.159
0.256635	2.653	0.316531	2.044
0.271731	2.421	0.335151	1.943
0.286827	2.277	0.35377	1.868
0.301923	2.168	0.37239	1.753
0.317019	2.041	0.391009	1.596
0.332116	1.841	0.409629	1.515
0.347212	1.684	0.428248	1.386
0.362308	1.577	0.446868	1.269
0.377404	1.519	0.465487	1.346
0.3925	1.514	0.484107	1.28
0.407596	1.449	0.502726	1.229
0.422693	1.36	0.521346	1.208
0.437789	1.29	0.539965	1.177
0.452885	1.148	0.558585	1.087
0.467981	1.085	0.577204	0.977
0.483077	1.069	0.595824	0.944
0.498173	1.024	0.614443	0.953
0.51327	1.021	0.633063	0.969
0.528366	1.014	0.651682	0.959
0.543462	0.95	0.670302	0.903
0.558558	0.924	0.688921	0.862
0.573654	0.87	0.707541	0.767
0.58875	0.762	0.72616	0.736
0.603847	0.735	0.74478	0.66
0.618943	0.751	0.763399	0.634
0.634039	0.618	0.782019	0.677
0.649135	0.518	0.800638	0.657
0.664231	0.615	0.819258	0.604
0.679327	0.687	0.837877	0.63
0.694424	0.664	0.856497	0.718
0.70952	0.623	0.875116	0.647
0.724616	0.597	0.893736	0.55
0.739712	0.474	0.912355	0.638
0.754808	0.452	0.930975	0.67
0.769904	0.537	0.949594	0.58
0.785001	0.495	0.968214	0.581
0.800097	0.369	0.986833	0.451
0.815193	0.322	1.00545	0.431
0.830289	0.349	1.02407	0.441
0.845385	0.36	1.04269	0.421
0.860481	0.377	1.06131	0.333
0.875578	0.395	1.07993	0.369
0.890674	0.335	1.09855	0.591
0.90577	0.296	1.11717	0.573
0.920866	0.243	1.13579	0.589
0.935962	0.241	1.15441	0.628
0.951058	0.269	1.17303	0.538
0.966155	0.261	1.19165	0.553
0.981251	0.255	1.21027	0.568
0.996347	0.233	1.22889	0.57
1.01144	0.182	1.24751	0.572
1.02654	0.125	1.26613	0.569
1.04164	0.117	1.28475	0.546
1.05673	0.166	1.30336	0.566
1.07183	0.151	1.32198	0.597
1.08692	0.088	1.3406	0.539
1.10202	0.096	1.35922	0.476
1.11712	0.133	1.37784	0.464
1.13221	0.138	1.39646	0.539
1.14731	0.076	1.41508	0.559
1.1624	0.064	1.4337	0.567
1.1775	0.118	1.45232	0.516
1.1926	0.102	1.47094	0.446
1.20769	0.024	1.48956	0.517
1.22279	0.025	1.50818	0.544
1.23789	0.075	1.5268	0.458
1.25298	0.069	1.54542	0.386
1.26808	0.019	1.56404	0.307
1.28317	-0.002	1.58266	0.35
1.29827	0.018	1.60128	0.3
1.31337	0.026	1.6199	0.35
1.32846	0.013	1.63852	0.337
1.34356	0.019	1.65713	0.364
1.35865	-0.042	1.67575	0.298
1.37375	-0.128	1.69437	0.24
1.38885	-0.146	1.71299	0.322
1.40394	-0.076	1.73161	0.448
1.41904	-0.015	1.75023	0.396
1.43414	-0.046	1.76885	0.32
1.44923	-0.094	1.78747	0.382
1.46433	-0.102	1.80609	0.289
1.47942	-0.117	1.82471	0.34
1.49452	-0.08	1.84333	0.332
1.50962	-0.115	1.86195	0.255
1.52471	-0.156	1.88057	0.282
1.53981	-0.163	1.89919	0.407
1.55491	-0.19	1.91781	0.369
1.57	-0.204	1.93643	0.327
1.5851	-0.184	1.95505	0.348
1.60019	-0.14	1.97367	0.304
1.61529	-0.089	1.99229	0.332
1.63039	-0.112	2.01091	0.335
1.64548	-0.199	2.02952	0.308
1.66058	-0.205	2.04814	0.313
1.67567	-0.179	2.06676	0.309
1.69077	-0.174	2.08538	0.356
1.70587	-0.179	2.104	0.283
1.72096	-0.224	2.12262	0.312
1.73606	-0.283	2.14124	0.431
1.75116	-0.273	2.15986	0.405
1.76625	-0.249	2.17848	0.312
1.78135	-0.228	2.1971	0.222
1.79644	-0.233	2.21572	0.266
1.81154	-0.218	2.23434	0.293
1.82664	-0.226	2.25296	0.247
1.84173	-0.26	2.27158	0.277
1.85683	-0.269	2.2902	0.292
1.87192	-0.279	2.30882	0.293
1.88702	-0.268	2.32744	0.464
1.90212	-0.232	2.34606	0.471
1.91721	-0.208	2.36468	0.433
1.93231	-0.203	2.3833	0.474
1.94741	-0.24	2.40191	0.388
1.9625	-0.253	2.42053	0.275
1.9776	-0.26	2.43915	0.348
1.99269	-0.265	2.45777	0.399
2.00779	-0.25	2.47639	0.351
2.02289	-0.296	2.49501	0.386
2.03798	-0.297	2.51363	0.485
2.05308	-0.272	2.53225	0.549
2.06817	-0.31	2.55087	0.522
2.08327	-0.309	2.56949	0.559
2.09837	-0.276	2.58811	0.582
2.11346	-0.257	2.60673	0.437
2.12856	-0.248	2.62535	0.287
2.14366	-0.237	2.64397	0.438
2.15875	-0.204	2.66259	0.507
2.17385	-0.227	2.68121	0.444
2.18894	-0.275	2.69983	0.416
2.20404	-0.277	2.71845	0.467
2.21914	-0.199	2.73707	0.456
2.23423	-0.189	2.75569	0.431
2.24933	-0.267	2.7743	0.448
2.26442	-0.294	2.79292	0.393
2.27952	-0.256	2.81154	0.498
2.29462	-0.239	2.83016	0.479
2.30971	-0.265	2.84878	0.449
2.32481	-0.21	2.8674	0.526
2.33991	-0.153	2.88602	0.521
2.355	-0.228	2.90464	0.465
2.3701	-0.303	2.92326	0.485
2.38519	-0.331	2.94188	0.471
2.40029	-0.293	2.9605	0.391
2.41539	-0.238	2.97912	0.351
2.43048	-0.227	2.99774	0.427
2.44558	-0.241	3.01636	0.467
2.46068	-0.3	3.03498	0.425
2.47577	-0.309	3.0536	0.441
2.49087	-0.248	3.07222	0.463
2.50596	-0.211	3.09084	0.372
2.52106	-0.261	3.10946	0.372
2.53616	-0.269	3.12807	0.354
2.55125	-0.299	3.14669	0.288
2.56635	-0.317	3.16531	0.383
2.58144	-0.25	3.18393	0.463
2.59654	-0.219	3.20255	0.44
2.61164	-0.243	3.22117	0.412
2.62673	-0.223	3.23979	0.493
2.64183	-0.2	3.25841	0.374
2.65693	-0.203	3.27703	0.274
2.67202	-0.195	3.29565	0.356
2.68712	-0.199	3.31427	0.379
2.70221	-0.179	3.33289	0.352
2.71731	-0.176	3.35151	0.381
2.73241	-0.172	3.37013	0.41
2.7475	-0.184	3.38875	0.349
2.7626	-0.222	3.40737	0.292
2.77769	-0.196	3.42599	0.352
2.79279	-0.231	3.44461	0.361
2.80789	-0.281	3.46323	0.292
2.82298	-0.276	3.48185	0.271
2.83808	-0.254	3.50046	0.217
2.85318	-0.25	3.51908	0.163
2.86827	-0.253	3.5377	0.238
2.88337	-0.245	3.55632	0.211
2.89846	-0.223	3.57494	0.144
2.91356	-0.225	3.59356	0.233
2.92866	-0.25	3.61218	0.315
2.94375	-0.264	3.6308	0.226
2.95885	-0.269	3.64942	0.149
2.97394	-0.188	3.66804	0.164
2.98904	-0.152	3.68666	0.209
3.00414	-0.257	3.70528	0.21
3.01923	-0.282	3.7239	0.306
3.03433	-0.233	3.74252	0.252
3.04943	-0.263	3.76114	0.269
3.06452	-0.274	3.77976	0.271
3.07962	-0.27	3.79838	0.194
3.09471	-0.277	3.817	0.229
3.10981	-0.232	3.83562	0.111
3.12491	-0.168	3.85424	0.109
3.14	-0.189	3.87285	0.144
3.1551	-0.276	3.89147	0.173
3.17019	-0.268	3.91009	0.198
3.18529	-0.24	3.92871	0.107
3.20039	-0.209	3.94733	-0.009
3.21548	-0.24	3.96595	-0.001
3.23058	-0.375	3.98457	0.1
3.24568	-0.417	4.00319	0.198
3.26077	-0.374	4.02181	0.237
3.27587	-0.334	4.04043	0.306
3.29096	-0.317	4.05905	0.357
3.30606	-0.263	4.07767	0.432
3.32116	-0.23	4.09629	0.328
3.33625	-0.294	4.11491	0.285
3.35135	-0.286	4.13353	0.217
3.36645	-0.244	4.15215	0.118
3.38154	-0.274	4.17077	0.133
3.39664	-0.272	4.18939	0.228
3.41173	-0.293	4.20801	0.187
3.42683	-0.305	4.22663	0.199
3.44193	-0.258	4.24524	0.213
3.45702	-0.194	4.26386	0.28
3.47212	-0.181	4.28248	0.323
3.48721	-0.172	4.3011	0.38
3.50231	-0.171	4.31972	0.313
3.51741	-0.233	4.33834	0.261
3.5325	-0.301	4.35696	0.22
3.5476	-0.333	4.37558	0.253
3.5627	-0.315	4.3942	0.179
3.57779	-0.303	4.41282	0.208
3.59289	-0.312	4.43144	0.228
3.60798	-0.299	4.45006	0.19
3.62308	-0.254	4.46868	0.254
3.63818	-0.249	4.4873	0.14
3.65327	-0.284	4.50592	-0.004
3.66837	-0.284	4.52454	-0.026
3.68346	-0.309	4.54316	0.028
3.69856	-0.347	4.56178	0.028
3.71366	-0.399	4.5804	-0.064
3.72875	-0.432	4.59901	-0.061
3.74385	-0.38	4.61763	-0.122
3.75895	-0.311	4.63625	-0.159
3.77404	-0.265	4.65487	-0.237
3.78914	-0.264	4.67349	-0.316
3.80423	-0.277	4.69211	-0.317
3.81933	-0.307	4.71073	-0.357
3.83443	-0.301	4.72935	-0.361
3.84952	-0.242	4.74797	-0.438
3.86462	-0.254	4.76659	-0.366
3.87971	-0.313	4.78521	-0.355
3.89481	-0.347	4.80383	-0.365
3.90991	-0.315	4.82245	-0.337
3.925	-0.28	4.84107	-0.426
3.9401	-0.278	4.85969	-0.439
3.9552	-0.247	4.87831	-0.326
3.97029	-0.252	4.89693	-0.353
3.98539	-0.276	4.91555	-0.484
4.00048	-0.272	4.93417	-0.525
4.01558	-0.245	4.95279	-0.549
4.03068	-0.228	4.9714	-0.633
4.04577	-0.189	4.99002	-0.593
4.06087	-0.159	5.00864	-0.509
4.07596	-0.137	5.02726	-0.606
4.09106	-0.122	5.04588	-0.636
4.10616	-0.199	5.0645	-0.657
4.12125	-0.25	5.08312	-0.656
4.13635	-0.177	5.10174	-0.64
4.15145	-0.141	5.12036	-0.662
4.16654	-0.221	5.13898	-0.603
4.18164	-0.204	5.1576	-0.492
4.19673	-0.159	5.17622	-0.503
4.21183	-0.162	5.19484	-0.605
4.22693	-0.173	5.21346	-0.645
4.24202	-0.236	5.23208	-0.622
4.25712	-0.24	5.2507	-0.654
4.27222	-0.168	5.26932	-0.718
4.28731	-0.152	5.28794	-0.839
4.30241	-0.167	5.30656	-0.849
4.3175	-0.171	5.32518	-0.723
4.3326	-0.214	5.34379	-0.709
4.3477	-0.191	5.36241	-0.729
4.36279	-0.152	5.38103	-0.796
4.37789	-0.18	5.39965	-0.778
4.39298	-0.195	5.41827	-0.691
4.40808	-0.256	5.43689	-0.829
4.42318	-0.313	5.45551	-0.819
4.43827	-0.333	5.47413	-0.732
4.45337	-0.305	5.49275	-0.829
4.46847	-0.251	5.51137	-0.755
4.48356	-0.234	5.52999	-0.719
4.49866	-0.219	5.54861	-0.773
4.51375	-0.232	5.56723	-0.786
4.52885	-0.254	5.58585	-0.815
4.54395	-0.232	5.60447	-0.774
4.55904	-0.193	5.62309	-0.756
4.57414	-0.233	5.64171	-0.748
4.58923	-0.392	5.66033	-0.759
4.60433	-0.438	5.67895	-0.705
4.61943	-0.376	5.69757	-0.795
4.63452	-0.354	5.71618	-0.663
4.64962	-0.36	5.7348	-0.572
4.66472	-0.351	5.75342	-0.711
4.67981	-0.342	5.77204	-0.83
4.69491	-0.361	5.79066	-0.846
4.71	-0.342	5.80928	-0.766
4.7251	-0.328	5.8279	-0.657
4.7402	-0.314	5.84652	-0.765
4.75529	-0.335	5.86514	-0.808
4.77039	-0.401	5.88376	-0.86
4.78548	-0.415	5.90238	-0.84
4.80058	-0.33	5.921	-0.818
4.81568	-0.274	5.93962	-0.896
4.83077	-0.354	5.95824	-0.995
4.84587	-0.389	5.97686	-1.101
4.86097	-0.344	5.99548	-1.089
4.87606	-0.334	6.0141	-1.136
4.89116	-0.336	6.03272	-1.228
4.90625	-0.335	6.05134	-1.242
4.92135	-0.369	6.06995	-1.108
4.93645	-0.372	6.08857	-1.079
4.95154	-0.364	6.10719	-1.114
4.96664	-0.348	6.12581	-1.212
4.98173	-0.291	6.14443	-1.137
4.99683	-0.254	6.16305	-1.126
5.01193	-0.255	6.18167	-1.193
5.02702	-0.345	6.20029	-1.158
5.04212	-0.379	6.21891	-1.229
5.05722	-0.257	6.23753	-1.26
5.07231	-0.178	6.25615	-1.223
5.08741	-0.285	6.27477	-1.19
5.1025	-0.397	6.29339	-1.197
5.1176	-0.397	6.31201	-1.289
5.1327	-0.328	6.33063	-1.306
5.14779	-0.263	6.34925	-1.329
5.16289	-0.297	6.36787	-1.281
5.17799	-0.35	6.38649	-1.288
5.19308	-0.343	6.40511	-1.311
5.20818	-0.272	6.42373	-1.322
5.22327	-0.234	6.44234	-1.308
5.23837	-0.31	6.46096	-1.238
5.25347	-0.31	6.47958	-1.254
5.26856	-0.316	6.4982	-1.328
5.28366	-0.351	6.51682	-1.389
5.29875	-0.343	6.53544	-1.315
5.31385	-0.313	6.55406	-1.326
5.32895	-0.284	6.57268	-1.34
5.34404	-0.316	6.5913	-1.347
5.35914	-0.334	6.60992	-1.4
5.37424	-0.357	6.62854	-1.389
5.38933	-0.385	6.64716	-1.276
5.40443	-0.361	6.66578	-1.258
5.41952	-0.36	6.6844	-1.26
5.43462	-0.386	6.70302	-1.241
5.44972	-0.3	6.72164	-1.27
5.46481	-0.217	6.74026	-1.371
5.47991	-0.271	6.75888	-1.435
5.495	-0.238	6.7775	-1.383
5.5101	-0.183	6.79612	-1.404
5.5252	-0.221	6.81473	-1.379
5.54029	-0.229	6.83335	-1.306
5.55539	-0.219	6.85197	-1.2
5.57049	-0.253	6.87059	-1
5.58558	-0.225	6.88921	-0.912
5.60068	-0.231	6.90783	-1.036
5.61577	-0.263	6.92645	-1.147
5.63087	-0.197	6.94507	-1.107
5.64597	-0.145	6.96369	-1.04
5.66106	-0.146	6.98231	-1.053
5.67616	-0.177	7.00093	-1.148
5.69125	-0.211	7.01955	-1.117
5.70635	-0.207	7.03817	-1.026
5.72145	-0.185	7.05679	-1.014
5.73654	-0.178	7.07541	-0.984
5.75164	-0.229	7.09403	-0.974
5.76674	-0.301	7.11265	-1.008
5.78183	-0.279	7.13127	-1.098
5.79693	-0.189	7.14989	-1.089
5.81202	-0.116	7.16851	-1.076
5.82712	-0.158	7.18712	-1.044
5.84222	-0.231	7.20574	-1.031
5.85731	-0.264	7.22436	-0.972
5.87241	-0.28	7.24298	-0.924
5.8875	-0.279	7.2616	-0.98
5.9026	-0.248	7.28022	-1.026
5.9177	-0.214	7.29884	-1.081
5.93279	-0.198	7.31746	-1.098
5.94789	-0.231	7.33608	-1.096
5.96299	-0.271	7.3547	-1.121
5.97808	-0.27	7.37332	-1.105
5.99318	-0.281	7.39194	-1.069
6.00827	-0.265	7.41056	-1.018
6.02337	-0.199	7.42918	-1.045
6.03847	-0.159	7.4478	-1.042
6.05356	-0.238	7.46642	-1.016
6.06866	-0.328	7.48504	-1.054
6.08376	-0.35	7.50366	-1.017
6.09885	-0.396	7.52228	-0.952
6.11395	-0.41	7.54089	-0.971
6.12904	-0.39	7.55951	-0.927
6.14414	-0.399	7.57813	-0.937
6.15924	-0.406	7.59675	-0.94
6.17433	-0.355	7.61537	-0.959
6.18943	-0.291	7.63399	-0.938
6.20452	-0.243	7.65261	-0.869
6.21962	-0.255	7.67123	-0.882
6.23472	-0.308	7.68985	-0.835
6.24981	-0.31	7.70847	-0.891
6.26491	-0.308	7.72709	-0.776
6.28001	-0.254	7.74571	-0.688
6.2951	-0.276	7.76433	-0.709
6.3102	-0.306	7.78295	-0.673
6.32529	-0.251	7.80157	-0.626
6.34039	-0.256	7.82019	-0.651
6.35549	-0.326	7.83881	-0.639
6.37058	-0.354	7.85743	-0.671
6.38568	-0.31	7.87605	-0.558
6.40077	-0.266	7.89467	-0.321
6.41587	-0.297	7.91328	-0.244
6.43097	-0.313	7.9319	-0.273
6.44606	-0.299	7.95052	-0.266
6.46116	-0.311	7.96914	-0.308
6.47626	-0.274	7.98776	-0.3
6.49135	-0.234	8.00638	-0.266
6.50645	-0.25	8.025	-0.233
6.52154	-0.195	8.04362	-0.206
6.53664	-0.224	8.06224	-0.088
6.55174	-0.297	8.08086	-0.103
6.56683	-0.266	8.09948	-0.159
6.58193	-0.228	8.1181	-0.134
6.59702	-0.213	8.13672	-0.111
6.61212	-0.253	8.15534	-0.087
6.62722	-0.327	8.17396	-0.079
6.64231	-0.286	8.19258	-0.044
6.65741	-0.177	8.2112	-0.088
6.67251	-0.183	8.22982	-0.035
6.6876	-0.204	8.24844	0.063
6.7027	-0.274	8.26706	0.115
6.71779	-0.319	8.28567	0.084
6.73289	-0.285	8.30429	0.077
6.74799	-0.298	8.32291	0.086
6.76308	-0.321	8.34153	0.085
6.77818	-0.313	8.36015	0.178
6.79327	-0.311	8.37877	0.146
6.80837	-0.304	8.39739	0.156
6.82347	-0.306	8.41601	0.177
6.83856	-0.285	8.43463	0.235
6.85366	-0.235	8.45325	0.16
6.86876	-0.255	8.47187	0.161
6.88385	-0.32	8.49049	0.254
6.89895	-0.336	8.50911	0.325
6.91404	-0.303	8.52773	0.176
6.92914	-0.268	8.54635	0.066
6.94424	-0.223	8.56497	0.179
6.95933	-0.177	8.58359	0.268
6.97443	-0.197	8.60221	0.328
6.98953	-0.237	8.62083	0.296
7.00462	-0.274	8.63945	0.251
7.01972	-0.28	8.65806	0.297
7.03481	-0.226	8.67668	0.36
7.04991	-0.18	8.6953	0.384
7.06501	-0.21	8.71392	0.314
7.0801	-0.239	8.73254	0.309
7.0952	-0.272	8.75116	0.29
7.11029	-0.306	8.76978	0.294
7.12539	-0.27	8.7884	0.38
7.14049	-0.18	8.80702	0.49
7.15558	-0.175	8.82564	0.463
7.17068	-0.236	8.84426	0.403
7.18578	-0.221	8.86288	0.268
7.20087	-0.176	8.8815	0.32
7.21597	-0.166	8.90012	0.381
7.23106	-0.188	8.91874	0.411
7.24616	-0.183	8.93736	0.382
7.26126	-0.21	8.95598	0.381
7.27635	-0.242	8.9746	0.432
7.29145	-0.259	8.99322	0.447
7.30654	-0.236	9.01183	0.455
7.32164	-0.186	9.03045	0.483
7.33674	-0.156	9.04907	0.481
7.35183	-0.137	9.06769	0.414
7.36693	-0.151	9.08631	0.464
7.38203	-0.209	9.10493	0.424
7.39712	-0.24	9.12355	0.387
7.41222	-0.151	9.14217	0.293
7.42731	-0.131	9.16079	0.398
7.44241	-0.191	9.17941	0.442
7.45751	-0.174	9.19803	0.465
7.4726	-0.18	9.21665	0.422
7.4877	-0.222	9.23527	0.395
7.50279	-0.202	9.25389	0.425
7.51789	-0.237	9.27251	0.476
7.53299	-0.29	9.29113	0.499
7.54808	-0.242	9.30975	0.404
7.56318	-0.231	9.32837	0.465
7.57828	-0.221	9.34699	0.523
7.59337	-0.16	9.36561	0.538
7.60847	-0.122	9.38422	0.582
7.62356	-0.122	9.40284	0.556
7.63866	-0.148	9.42146	0.563
7.65376	-0.184	9.44008	0.589
7.66885	-0.187	9.4587	0.689
7.68395	-0.14	9.47732	0.735
7.69904	-0.1	9.49594	0.684
7.71414	-0.106	9.51456	0.598
7.72924	-0.111	9.53318	0.609
7.74433	-0.077	9.5518	0.673
7.75943	-0.085	9.57042	0.734
7.77453	-0.08	9.58904	0.721
7.78962	-0.053	9.60766	0.715
7.80472	-0.075	9.62628	0.626
7.81981	-0.072	9.6449	0.561
7.83491	-0.069	9.66352	0.642
7.85001	-0.037	9.68214	0.76
7.8651	-0.028	9.70076	0.843
7.8802	-0.044	9.71938	0.966
7.8953	0.005	9.738	1.059
7.91039	0.023	9.75661	1.095
7.92549	0.007	9.77523	1.033
7.94058	-0.008	9.79385	0.96
7.95568	-0.024	9.81247	0.958
7.97078	0.022	9.83109	1.113
7.98587	0.071	9.84971	1.165
8.00097	0.02	9.86833	1.087
8.01606	-0.002	9.88695	1.022
8.03116	0.046	9.90557	1.055
8.04626	0.049	9.92419	0.984
8.06135	0.072	9.94281	0.991
8.07645	0.135	9.96143	1.147
8.09155	0.133	9.98005	1.177
8.10664	0.111	9.99867	1.159
8.12174	0.101	10.0173	1.029
8.13683	0.12	10.0359	0.954
8.15193	0.168	10.0545	1.063
8.16703	0.16	10.0731	1.121
8.18212	0.166	10.0918	1.029
8.19722	0.139	10.1104	1.007
8.21231	0.136	10.129	0.996
8.22741	0.173	10.1476	0.962
8.24251	0.125	10.1662	0.998
8.2576	0.104	10.1849	1.031
8.2727	0.122	10.2035	0.987
8.2878	0.141	10.2221	0.937
8.30289	0.15	10.2407	1.049
8.31799	0.122	10.2593	1.117
8.33308	0.156	10.278	1.013
8.34818	0.159	10.2966	0.991
8.36328	0.071	10.3152	1.028
8.37837	0.067	10.3338	1.066
8.39347	0.061	10.3524	1.126
8.40856	0.025	10.3711	1.221
8.42366	0.084	10.3897	1.39
8.43876	0.177	10.4083	1.461
8.45385	0.136	10.4269	1.455
8.46895	0.107	10.4455	1.51
8.48405	0.133	10.4642	1.604
8.49914	0.097	10.4828	1.773
8.51424	0.049	10.5014	1.903
8.52933	0.054	10.52	2.157
8.54443	0.045	10.5386	2.475
8.55953	0.055	10.5573	2.703
8.57462	0.07	10.5759	3.144
8.58972	0.062	10.5945	3.459
8.60481	0.101	10.6131	3.903
8.61991	0.128	10.6317	4.52
8.63501	0.121	10.6504	5.347
8.6501	0.123	10.669	6.143
8.6652	0.141	10.6876	7.03
8.6803	0.133	10.7062	7.949
8.69539	0.112	10.7248	9.027
8.71049	0.1	10.7434	10.27
8.72558	0.085	10.7621	11.459
8.74068	0.052	10.7807	12.517
8.75578	0.044	10.7993	13.792
8.77087	0.021	10.8179	15.027
8.78597	-0.002	10.8365	16.135
8.80107	0.005	10.8552	17.416
8.81616	0.003	10.8738	18.527
8.83126	0.038	10.8924	19.684
8.84635	0.018	10.911	20.603
8.86145	-0.058	10.9296	21.687
8.87655	0.011	10.9483	22.369
8.89164	0.089	10.9669	23.121
8.90674	0.111	10.9855	23.928
8.92183	0.116	11.0041	24.663
8.93693	0.092	11.0227	25.289
8.95203	0.092	11.0414	25.84
8.96712	0.075	11.06	26.27
8.98222	0.128	11.0786	26.798
8.99732	0.171	11.0972	27.278
9.01241	0.125	11.1158	27.68
9.02751	0.049	11.1345	28.113
9.0426	0.009	11.1531	28.604
9.0577	0.03	11.1717	29.097
9.0728	0.092	11.1903	29.697
9.08789	0.143	11.2089	30.526
9.10299	0.165	11.2276	31.572
9.11808	0.143	11.2462	33.092
9.13318	0.04	11.2648	34.597
9.14828	0.029	11.2834	36.874
9.16337	0.119	11.302	39.511
9.17847	0.172	11.3207	42.881
9.19357	0.177	11.3393	46.818
9.20866	0.164	11.3579	52.231
9.22376	0.201	11.3765	58.527
9.23885	0.19	11.3951	65.519
9.25395	0.101	11.4137	74.071
9.26905	0.096	11.4324	83.998
9.28414	0.187	11.451	96.054
9.29924	0.201	11.4696	108.299
9.31433	0.184	11.4882	123.436
9.32943	0.242	11.5068	138.253
9.34453	0.26	11.5255	156.642
9.35962	0.244	11.5441	175.439
9.37472	0.252	11.5627	197.571
9.38982	0.253	11.5813	218.939
9.40491	0.259	11.5999	242.997
9.42001	0.297	11.6186	265.921
9.4351	0.36	11.6372	293.336
9.4502	0.314	11.6558	320.413
9.4653	0.25	11.6744	347.481
9.48039	0.28	11.693	374.848
9.49549	0.297	11.7117	402.467
9.51058	0.308	11.7303	431.054
9.52568	0.363	11.7489	455.43
9.54078	0.397	11.7675	482.749
9.55587	0.323	11.7861	506.132
9.57097	0.326	11.8048	529.581
9.58607	0.412	11.8234	548.384
9.60116	0.413	11.842	568.227
9.61626	0.403	11.8606	583.066
9.63135	0.418	11.8792	596.807
9.64645	0.462	11.8979	606.752
9.66155	0.445	11.9165	614.402
9.67664	0.374	11.9351	618.388
9.69174	0.354	11.9537	619.891
9.70684	0.367	11.9723	618.106
9.72193	0.463	11.991	613.417
9.73703	0.518	12.0096	606.065
9.75212	0.482	12.0282	596.618
9.76722	0.509	12.0468	583.6
9.78232	0.554	12.0654	570.037
9.79741	0.573	12.0841	553.43
9.81251	0.642	12.1027	536.78
9.8276	0.671	12.1213	516.806
9.8427	0.644	12.1399	498.31
9.8578	0.705	12.1585	477.419
9.87289	0.768	12.1771	458.646
9.88799	0.798	12.1958	436.664
9.90309	0.769	12.2144	416.349
9.91818	0.798	12.233	395.654
9.93328	0.847	12.2516	375.775
9.94837	0.893	12.2702	355.603
9.96347	0.898	12.2889	335.871
9.97857	0.875	12.3075	318.954
9.99366	0.974	12.3261	300.677
10.0088	1.025	12.3447	283.807
10.0239	1.015	12.3633	266.746
10.039	1.046	12.382	252.491
10.054	1.048	12.4006	236.678
10.0691	1.042	12.4192	223.811
10.0842	1.089	12.4378	210.104
10.0993	1.091	12.4564	197.797
10.1144	1.115	12.4751	185.22
10.1295	1.15	12.4937	174.48
10.1446	1.189	12.5123	164.168
10.1597	1.243	12.5309	154.856
10.1748	1.246	12.5495	145.426
10.1899	1.25	12.5682	136.17
10.205	1.281	12.5868	128.397
10.2201	1.38	12.6054	120.532
10.2352	1.442	12.624	113.684
10.2503	1.432	12.6426	106.708
10.2654	1.428	12.6613	100.817
10.2805	1.452	12.6799	94.282
10.2956	1.548	12.6985	89.04
10.3107	1.606	12.7171	83.753
10.3258	1.614	12.7357	79.255
10.3409	1.637	12.7544	74.321
10.356	1.692	12.773	70.317
10.3711	1.748	12.7916	66.231
10.3862	1.899	12.8102	62.541
10.4013	2.026	12.8288	58.961
10.4164	2.087	12.8475	55.754
10.4315	2.252	12.8661	53.028
10.4465	2.413	12.8847	50.122
10.4616	2.59	12.9033	47.506
10.4767	2.804	12.9219	44.893
10.4918	3.058	12.9405	42.666
10.5069	3.404	12.9592	40.372
10.522	3.791	12.9778	38.575
10.5371	4.212	12.9964	36.492
10.5522	4.753	13.015	34.781
10.5673	5.371	13.0336	33.081
10.5824	6.132	13.0523	31.62
10.5975	7.089	13.0709	30.172
10.6126	8.008	13.0895	29.025
10.6277	9.054	13.1081	27.588
10.6428	10.263	13.1267	26.497
10.6579	11.491	13.1454	25.561
10.673	12.792	13.164	24.587
10.6881	14.142	13.1826	23.585
10.7032	15.618	13.2012	22.612
10.7183	17.311	13.2198	21.818
10.7334	19.069	13.2385	21.031
10.7485	20.61	13.2571	20.355
10.7636	22.192	13.2757	19.712
10.7787	23.816	13.2943	19.149
10.7938	25.549	13.3129	18.477
10.8089	27.35	13.3316	17.939
10.824	28.888	13.3502	17.527
10.839	30.441	13.3688	16.942
10.8541	32.037	13.3874	16.27
10.8692	33.589	13.406	15.805
10.8843	35.058	13.4247	15.412
10.8994	36.459	13.4433	15.025
10.9145	37.712	13.4619	14.628
10.9296	38.955	13.4805	14.156
10.9447	40.206	13.4991	13.874
10.9598	41.209	13.5178	13.549
10.9749	42.185	13.5364	13.117
10.99	43.235	13.555	12.649
11.0051	44.082	13.5736	12.293
11.0202	44.805	13.5922	11.99
11.0353	45.42	13.6108	11.642
11.0504	46.012	13.6295	11.273
11.0655	46.634	13.6481	11.069
11.0806	47.287	13.6667	10.79
11.0957	47.8	13.6853	10.412
11.1108	48.314	13.7039	10.115
11.1259	48.832	13.7226	9.766
11.141	49.386	13.7412	9.45
11.1561	50.009	13.7598	9.255
11.1712	50.543	13.7784	8.892
11.1863	51.116	13.797	8.582
11.2014	51.893	13.8157	8.346
11.2165	52.819	13.8343	8.072
11.2315	53.837	13.8529	7.8
11.2466	55.025	13.8715	7.554
11.2617	56.464	13.8901	7.391
11.2768	58.358	13.9088	7.164
11.2919	60.71	13.9274	6.893
11.307	63.342	13.946	6.627
11.3221	66.394	13.9646	6.435
11.3372	69.897	13.9832	6.262
11.3523	73.823	14.0019	6.048
11.3674	78.887	14.0205	5.896
11.3825	84.002	14.0391	5.603
11.3976	90.374	14.0577	5.481
11.4127	97.777	14.0763	5.335
11.4278	105.902	14.095	5.135
11.4429	115.302	14.1136	4.943
11.458	124.952	14.1322	4.737
11.4731	135.677	14.1508	4.555
11.4882	147.561	14.1694	4.484
11.5033	161.389	14.1881	4.356
11.5184	175.693	14.2067	4.208
11.5335	191.361	14.2253	4.053
11.5486	208.142	14.2439	3.895
11.5637	225.437	14.2625	3.779
11.5788	245.172	14.2812	3.78
11.5939	263.961	14.2998	3.692
11.609	283.432	14.3184	3.545
11.624	305.743	14.337	3.448
11.6391	328.832	14.3556	3.348
11.6542	352.411	14.3742	3.207
11.6693	375.643	14.3929	3.13
11.6844	398.165	14.4115	3.182
11.6995	421.759	14.4301	3.046
11.7146	447.322	14.4487	3.038
11.7297	470.554	14.4673	2.968
11.7448	495.075	14.486	2.763
11.7599	519.769	14.5046	2.762
11.775	542.883	14.5232	2.793
11.7901	567.209	14.5418	2.7
11.8052	587.829	14.5604	2.631
11.8203	608.162	14.5791	2.571
11.8354	628.526	14.5977	2.538
11.8505	648.421	14.6163	2.499
11.8656	666.743	14.6349	2.419
11.8807	682.991	14.6535	2.324
11.8958	697.663	14.6722	2.276
11.9109	710.917	14.6908	2.335
11.926	723.028	14.7094	2.298
11.9411	732.117	14.728	2.366
11.9562	740.001	14.7466	2.331
11.9713	747.15	14.7653	2.205
11.9864	752.736	14.7839	2.167
12.0015	756.19	14.8025	2.166
12.0165	756.567	14.8211	2.065
12.0316	755.834	14.8397	2.012
12.0467	754.082	14.8584	2.06
12.0618	751.07	14.877	2.022
12.0769	746.844	14.8956	2.044
12.092	740.474	14.9142	2.071
12.1071	733.086	14.9328	2.051
12.1222	725.713	14.9515	2.023
12.1373	716.175	14.9701	1.98
12.1524	706.349	14.9887	1.964
12.1675	696.067	15.0073	1.967
12.1826	684.627	15.0259	1.957
12.1977	672.06	15.0446	1.988
12.2128	658.792	15.0632	1.938
12.2279	646.082	15.0818	1.983
12.243	633.894	15.1004	1.977
12.2581	621.397	15.119	1.901
12.2732	607.578	15.1376	1.997
12.2883	594.039	15.1563	1.968
12.3034	580.029	15.1749	1.916
12.3185	566.206	15.1935	1.972
12.3336	553.273	15.2121	1.91
12.3487	539.511	15.2307	1.914
12.3638	526.141	15.2494	2.103
12.3789	512.672	15.268	2.089
12.394	499.768	15.2866	2.036
12.409	487.219	15.3052	1.938
12.4241	473.463	15.3238	1.901
12.4392	459.668	15.3425	1.957
12.4543	447.395	15.3611	1.971
12.4694	435.435	15.3797	1.879
12.4845	422.938	15.3983	1.923
12.4996	410.639	15.4169	1.836
12.5147	398.299	15.4356	1.86
12.5298	386.614	15.4542	2.062
12.5449	375.252	15.4728	2.155
12.56	363.19	15.4914	2.098
12.5751	351.729	15.51	1.966
12.5902	340.994	15.5287	1.995
12.6053	330.293	15.5473	2.049
12.6204	319.657	15.5659	2.123
12.6355	308.949	15.5845	2.095
12.6506	298.261	15.6031	2.013
12.6657	288.154	15.6218	2.05
12.6808	278.644	15.6404	2.022
12.6959	268.698	15.659	2.03
12.711	259.491	15.6776	2.044
12.7261	250.226	15.6962	2.017
12.7412	241.368	15.7149	2.047
12.7563	232.932	15.7335	2.082
12.7714	223.911	15.7521	2.078
12.7865	215.358	15.7707	2.127
12.8015	207.46	15.7893	2.047
12.8166	199.778	15.808	1.991
12.8317	192.115	15.8266	1.982
12.8468	184.785	15.8452	1.966
12.8619	177.405	15.8638	2.017
12.877	170.522	15.8824	2.001
12.8921	163.973	15.901	1.923
12.9072	157.386	15.9197	1.832
12.9223	151.26	15.9383	1.927
12.9374	145.177	15.9569	1.949
12.9525	139.343	15.9755	1.886
12.9676	134.004	15.9941	1.84
12.9827	128.518	16.0128	1.877
12.9978	123.231	16.0314	1.873
13.0129	118.313	16.05	1.92
13.028	113.757	16.0686	1.824
13.0431	109.148	16.0872	1.759
13.0582	104.856	16.1059	1.863
13.0733	100.627	16.1245	1.897
13.0884	96.77	16.1431	1.949
13.1035	93.08	16.1617	1.942
13.1186	89.138	16.1803	1.955
13.1337	85.561	16.199	1.914
13.1488	82.238	16.2176	1.913
13.1639	79.13	16.2362	1.945
13.179	76.177	16.2548	1.828
13.194	73.185	16.2734	1.849
13.2091	70.401	16.2921	1.909
13.2242	67.795	16.3107	1.896
13.2393	65.243	16.3293	1.925
13.2544	62.707	16.3479	1.958
13.2695	60.465	16.3665	1.908
13.2846	58.186	16.3852	1.946
13.2997	55.975	16.4038	2.002
13.3148	54.016	16.4224	2.052
13.3299	52.036	16.441	2.063
13.345	50.17	16.4596	1.971
13.3601	48.35	16.4783	2.011
13.3752	46.603	16.4969	2.072
13.3903	44.952	16.5155	2.026
13.4054	43.375	16.5341	1.966
13.4205	41.852	16.5527	1.999
13.4356	40.472	16.5713	1.922
13.4507	38.667	16.59	2.022
13.4658	32.041	16.6086	2.084
13.4809	44.145	16.6272	2.063
13.496	65.075	16.6458	2.274
13.5111	70.866	16.6644	2.313
13.5262	61.507	16.6831	2.254
13.5413	52.989	16.7017	2.144
13.5564	47.211	16.7203	2.087
13.5715	42.838	16.7389	2.138
13.5865	39.251	16.7575	2.066
13.6016	36.383	16.7762	2.089
13.6167	34.255	16.7948	2.14
13.6318	32.489	16.8134	2.049
13.6469	30.857	16.832	2.063
13.662	29.466	16.8506	2.139
13.6771	28.088	16.8693	2.269
13.6922	26.754	16.8879	2.277
13.7073	25.617	16.9065	2.126
13.7224	24.562	16.9251	2.145
13.7375	23.577	16.9437	2.245
13.7526	22.682	16.9624	2.307
13.7677	21.851	16.981	2.221
13.7828	21.08	16.9996	2.161
13.7979	20.347	17.0182	2.14
13.813	19.572	17.0368	2.209
13.8281	18.851	17.0555	2.286
13.8432	18.213	17.0741	2.234
13.8583	17.588	17.0927	2.11
13.8734	17.012
13.8885	16.386
13.9036	15.771
13.9187	15.252
13.9338	14.761
13.9489	14.233
13.964	13.727
13.9791	13.272
13.9941	12.872
14.0092	12.539
14.0243	12.076
14.0394	11.602
14.0545	11.207
14.0696	10.809
14.0847	10.489
14.0998	10.192
14.1149	9.947
14.13	9.63
14.1451	9.247
14.1602	8.962
14.1753	8.662
14.1904	8.35
14.2055	8.079
14.2206	7.863
14.2357	7.669
14.2508	7.37
14.2659	7.024
14.281	6.793
14.2961	6.664
14.3112	6.506
14.3263	6.278
14.3414	6.105
14.3565	5.924
14.3716	5.736
14.3866	5.628
14.4017	5.467
14.4168	5.313
14.4319	5.21
14.447	5.065
14.4621	4.867
14.4772	4.612
14.4923	4.468
14.5074	4.406
14.5225	4.265
14.5376	4.099
14.5527	4.02
14.5678	4.008
14.5829	3.953
14.598	3.824
14.6131	3.666

## Sheet: S3C
Temperature (oC)	hCCS SH	hCCS S-S
26	0	0.0215433
27	0.00829804	0.0217616
28	0.014111	0.0189645
29	0.0178926	0.016346
30	0.020637	0.0144217
31	0.0258665	0.0113271
32	0.0315282	0.00928387
33	0.0395237	0.00771672
34	0.0449909	0.00392779
35	0.0568545	0.00301527
36	0.0707926	0.00198373
37	0.089528	0.00029756
38	0.117447	0
39	0.160126	7.93493e-05
40	0.218645	0.000476096
41	0.296309	0.00327316
42	0.394243	0.0061099
43	0.508276	0.0099385
44	0.622915	0.016465
45	0.725797	0.0221186
46	0.80908	0.0283674
47	0.873628	0.0324142
48	0.921082	0.0349732
49	0.956565	0.036223
50	0.981437	0.0352113
51	0.997342	0.0342392
52	1	0.0354493
53	0.989865	0.0396747
54	0.963826	0.0478278
55	0.928062	0.0646895
56	0.883395	0.0934934
57	0.83015	0.141738
58	0.768692	0.219778
59	0.70892	0.339298
60	0.651634	0.509363
61	0.591149	0.709939
62	0.533257	0.877822
63	0.478823	0.97197
64	0.424734	1
65	0.373801	0.985241
66	0.32304	0.955664
67	0.276385	0.925987
68	0.229925	0.890795
69	0.186468	0.858996
70	0.14675	0.828625
71	0.107097	0.801527
72	0.0724782	0.773577
73	0.0402801	0.746717
74	0.0119716	0.719718
75	-0.0153643	0.693692
76	-0.0438672	0.668836
77	-0.0665788	0.642769
78	-0.0879506	0.618151
79	-0.107637	0.594446
80	-0.12702	0.567804
81	-0.143941	0.544574
82	-0.160602	0.520373
83	-0.176787	0.495041
84	-0.194053	0.471593
85	-0.209136	0.449415
86	-0.223377	0.426959
87	-0.237423	0.40486
88	-0.24987	0.383059
89	-0.264716	0.362012
90	-0.275478	0.342115
91	-0.2876	0.322952
92	-0.301776	0.303908
93	-0.311738	0.288772
94	-0.322565	0.271256
95	-0.333521	0.254315

## Sheet: S3D
Temperature (oC)	SOD1-hCCS SH	SOD1-hCCS S-S	SOD1 C57,146A
26	0	0.031964	0.0154372
27	0.00736829	0.0282456	0.015411
28	0.0113506	0.0265242	0.0137957
29	0.0174837	0.021167	0.0116945
30	0.0169726	0.0168427	0.00919275
31	0.0217854	0.0150249	0.00764311
32	0.0250437	0.0117334	0.00574547
33	0.0276843	0.00900665	0.0042221
34	0.0307083	0.00689959	0.0026068
35	0.0330082	0.00459973	0.00154307
36	0.0346267	0.00351177	0.000558131
37	0.037459	0.00169391	0
38	0.0393117	0.00202443	0.00063036
39	0.0398654	0	0.000151024
40	0.0433366	0.00133585	0.00166783
41	0.0456791	0.00293336	0.0036574
42	0.0484688	0.00698222	0.00736733
43	0.0550066	0.0124496	0.0130143
44	0.0635887	0.0231226	0.0221217
45	0.0805614	0.0368942	0.0337308
46	0.104966	0.0579924	0.0498903
47	0.144938	0.086059	0.0702457
48	0.204481	0.123628	0.095099
49	0.288896	0.170162	0.12424
50	0.398313	0.222508	0.156224
51	0.519592	0.274248	0.188996
52	0.641233	0.325796	0.224185
53	0.738788	0.370333	0.263359
54	0.81509	0.402917	0.307057
55	0.870757	0.425654	0.355825
56	0.923975	0.447509	0.411329
57	0.970995	0.466225	0.470629
58	1	0.487874	0.534545
59	0.997636	0.516684	0.601527
60	0.957153	0.555369	0.673684
61	0.882214	0.61018	0.745683
62	0.794987	0.684574	0.818581
63	0.709996	0.782739	0.887566
64	0.62113	0.891314	0.944732
65	0.539099	0.973696	0.985462
66	0.46203	1	1
67	0.387559	0.979646	0.983729
68	0.31871	0.930233	0.940221
69	0.255356	0.866167	0.875839
70	0.200605	0.796951	0.797963
71	0.149879	0.733298	0.713882
72	0.104029	0.674053	0.629138
73	0.063823	0.618374	0.54794
74	0.0301546	0.56691	0.473518
75	-0.00134162	0.518998	0.404061
76	-0.0279186	0.475204	0.343021
77	-0.0499595	0.438475	0.289578
78	-0.0704885	0.402504	0.244126
79	-0.0861195	0.372027	0.207303
80	-0.101921	0.342184	0.179173
81	-0.115997	0.317505	0.158595
82	-0.129456	0.294093	0.144293
83	-0.140466	0.272734	0.135252
84	-0.151817	0.255216	0.129631
85	-0.161953	0.237327	0.126663
86	-0.171728	0.221834	0.124299
87	-0.182078	0.204123	0.122506
88	-0.191703	0.18925	0.119683
89	-0.200009	0.173261	0.115835
90	-0.207185	0.158016	0.109906
91	-0.21466	0.142536	0.103202
92	-0.222603	0.125611	0.0953485
93	-0.228758	0.111826	0.0869831
94	-0.236275	0.0969386	0.0777706
95	-0.243196	0.0850261	0.0689719

## Sheet: S5C
Termperature (oC)	wild-type hCCS	R104H hCCS	R104A hCCS
25	0	0	0
26	0.00176307	0.00430806	0.00360178
27	0.00338911	0.00797028	0.00700197
28	0.00487452	0.0110159	0.0102191
29	0.00622315	0.0133119	0.0132041
30	0.00745383	0.0155219	0.0160398
31	0.00856615	0.0178624	0.0190685
31.9	0.00966029	0.020277	0.0223468
32.9	0.0108131	0.0226738	0.0258563
33.9	0.0120618	0.0251081	0.0295798
34.9	0.013408	0.0277371	0.0335792
35.9	0.0149096	0.0306582	0.0380277
36.9	0.016632	0.0339435	0.0430379
37.9	0.018683	0.0376677	0.0486321
38.9	0.0211492	0.0419321	0.0548141
39.9	0.0241126	0.0469424	0.0618359
40.9	0.0277299	0.0528235	0.0701292
41.8	0.0321141	0.059815	0.0801339
42.8	0.0374512	0.0685125	0.0924655
43.8	0.0439965	0.079525	0.108124
44.8	0.0519767	0.0933726	0.128657
45.8	0.0616306	0.110416	0.156001
46.8	0.073181	0.13083	0.192138
47.8	0.0869535	0.15505	0.238662
48.8	0.103205	0.183517	0.295378
49.8	0.122211	0.216328	0.359616
50.8	0.144333	0.253235	0.427047
51.7	0.169838	0.293281	0.493002
52.7	0.199418	0.335011	0.554631
53.7	0.234159	0.377151	0.612162
54.7	0.275462	0.419214	0.668186
55.7	0.325295	0.462223	0.72632
56.7	0.385517	0.508552	0.788846
57.7	0.457778	0.560829	0.854659
58.7	0.543132	0.62081	0.918561
59.7	0.640728	0.689201	0.971005
60.7	0.746811	0.765758	1
61.6	0.851813	0.846476	0.998288
62.6	0.938809	0.921481	0.969516
63.6	0.990278	0.976419	0.925792
64.6	1	1	0.879619
65.6	0.977568	0.993199	0.836971
66.6	0.940233	0.966804	0.798021
67.6	0.9009	0.932575	0.762064
68.6	0.863969	0.896833	0.728925
69.6	0.829574	0.859931	0.698519
70.6	0.79721	0.821271	0.670628
71.5	0.766325	0.781157	0.644806
72.5	0.73671	0.740371	0.620704
73.5	0.708438	0.699565	0.598313
74.5	0.681507	0.658803	0.577638
75.5	0.655692	0.618533	0.558599
76.5	0.630831	0.579745	0.54116
77.5	0.606897	0.543276	0.525205
78.5	0.583713	0.5093	0.51048
79.5	0.561163	0.477221	0.49666
80.4	0.539272	0.446828	0.48365
81.4	0.518073	0.418319	0.471531
82.4	0.497642	0.391673	0.460151
83.4	0.477927	0.366883	0.4492
84.4	0.458923	0.343971	0.438616
85.4	0.440646	0.322982	0.428391
86.4	0.422895	0.303877	0.418337
87.4	0.405679	0.28656	0.40825
88.4	0.389066	0.27097	0.398096
89.4	0.372981	0.256882	0.387998
90.3	0.357439	0.244074	0.377928
91.3	0.342366	0.232255	0.367673
92.3	0.327724	0.22112	0.357125
93.3	0.313854	0.210724	0.346515
94.3	0.300708	0.201091	0.335813
95.3	0.288287	0.192217	0.325022

## Sheet: S5E
Termperature (oC)	wt hCCS-SOD1	R104H hCCS-SOD1	R104A hCCS-SOD1	SOD1
25	0	0	0	0.0512385
26	0.000872908	0.00148696	0.0035597	0.0481445
27	0.0017593	0.00298756	0.00714478	0.0448001
28	0.00265104	0.00450787	0.0107777	0.041228
29	0.00358463	0.0060351	0.0144087	0.037364
30	0.00437402	0.0075433	0.0181243	0.0333255
31	0.00514271	0.00915984	0.022259	0.0291396
31.9	0.00599953	0.0109062	0.026655	0.0249524
32.9	0.00690898	0.0127622	0.0312931	0.0207813
33.9	0.00790755	0.0147495	0.0363396	0.0167089
34.9	0.0090737	0.0169565	0.0419553	0.0130296
35.9	0.0104433	0.0194409	0.0483167	0.00975535
36.9	0.0120556	0.0221985	0.0554551	0.00705894
37.9	0.0140058	0.0253033	0.0635052	0.00480687
38.9	0.0163871	0.0289375	0.0726811	0.0028806
39.9	0.0191766	0.0332599	0.0831557	0.00143269
40.9	0.0224288	0.0384194	0.0950163	0.00050383
41.8	0.026369	0.0446405	0.10832	0
42.8	0.0313028	0.0523806	0.12336	0.000190233
43.8	0.0374789	0.0622503	0.140677	0.00141774
44.8	0.0450371	0.0749323	0.160782	0.00430884
45.8	0.0541202	0.0910315	0.184265	0.0097797
46.8	0.0650477	0.111111	0.212109	0.0188342
47.8	0.0783564	0.135983	0.246081	0.0336563
48.8	0.094327	0.166258	0.288358	0.0574737
49.8	0.113355	0.202349	0.339891	0.0951358
50.8	0.135996	0.244615	0.39903	0.152859
51.7	0.162272	0.292652	0.460492	0.235192
52.7	0.191998	0.3449	0.517713	0.343795
53.7	0.224711	0.398226	0.567095	0.474798
54.7	0.260148	0.448747	0.609599	0.616884
55.7	0.298413	0.493655	0.649909	0.754039
56.7	0.339678	0.532847	0.693326	0.869057
57.7	0.384169	0.569096	0.74369	0.950079
58.7	0.432548	0.605963	0.803062	0.992954
59.7	0.486614	0.646552	0.869814	1
60.7	0.549454	0.693801	0.93547	0.979447
61.6	0.625514	0.749596	0.983982	0.941216
62.6	0.718381	0.814404	1	0.894559
63.6	0.822757	0.884512	0.980499	0.847609
64.6	0.918872	0.948066	0.936684	0.806757
65.6	0.981655	0.989682	0.884524	0.776811
66.6	1	1	0.83386	0.758772
67.6	0.983851	0.982292	0.786742	0.747621
68.6	0.952509	0.950002	0.74236	0.731171
69.6	0.918633	0.914143	0.700091	0.694825
70.6	0.884689	0.877902	0.659848	0.632503
71.5	0.850063	0.841562	0.621744	0.552392
72.5	0.814066	0.805061	0.586163	0.470227
73.5	0.776212	0.767978	0.553158	0.397408
74.5	0.737818	0.729732	0.522479	0.336559
75.5	0.700571	0.690257	0.494151	0.285987
76.5	0.665495	0.650748	0.468212	0.244009
77.5	0.632328	0.612118	0.444756	0.209502
78.5	0.600294	0.574299	0.423711	0.181533
79.5	0.569657	0.537796	0.404623	0.159487
80.4	0.540562	0.503398	0.38712	0.142611
81.4	0.512985	0.471072	0.370984	0.130045
82.4	0.486979	0.440431	0.356311	0.121061
83.4	0.462221	0.411224	0.343206	0.114826
84.4	0.438625	0.383512	0.331484	0.110519
85.4	0.416048	0.357551	0.320813	0.107199
86.4	0.394671	0.333506	0.31094	0.104107
87.4	0.374942	0.311583	0.301874	0.10113
88.4	0.356776	0.29185	0.293532	0.0985602
89.4	0.339763	0.274229	0.285852	0.0967387
90.3	0.323568	0.258549	0.278769	0.0957442
91.3	0.308241	0.244219	0.271906	0.0955359
92.3	0.29352	0.230351	0.265025	0.0961246
93.3	0.280288	0.217987	0.258519	0.0972581
94.3	0.268458	0.207007	0.252318	0.0989781
95.3	0.258025	0.197433	0.246441	0.10128

## Sheet: S7C
Volume (ml)	200 uM	20 uM
0	-0.000315182	-0.00403822
0.00416667	-0.00047936	-0.00490102
0.00833333	-0.000722761	-0.00610566
0.0125	-0.000832644	-0.006966
0.0166667	-0.000812819	-0.00702037
0.0208333	-0.000762465	-0.00679224
0.025	-0.00075331	-0.00668329
0.0291667	-0.000706498	-0.00674275
0.0333333	-0.000626487	-0.00650533
0.0375	-0.000605517	-0.00585952
0.0416667	-0.000652763	-0.00551511
0.0458333	-0.000684748	-0.00558795
0.05	-0.000646389	-0.00578807
0.0541667	-0.000617062	-0.00567418
0.0583333	-0.000608843	-0.00544448
0.0625	-0.000552723	-0.0055063
0.0666667	-0.000449038	-0.00559805
0.0708333	-0.00045838	-0.00514234
0.075	-0.000498351	-0.00481514
0.0791667	-0.000451385	-0.00429658
0.0833333	-0.000294872	-0.00352802
0.0875	-0.000203833	-0.00269958
0.0916667	-0.000254741	-0.00197342
0.0958333	-0.000319142	-0.00193072
0.1	-0.000308441	-0.00233414
0.104167	-0.000241038	-0.002518
0.108333	-0.00018337	-0.0024717
0.1125	-0.000174435	-0.00249603
0.116667	-0.000191995	-0.00285983
0.120833	-0.000210978	-0.00291215
0.125	-0.000245925	-0.00271339
0.129167	-0.000274606	-0.0028634
0.133333	-0.000305865	-0.00320267
0.1375	-0.000346158	-0.00294656
0.141667	-0.000375483	-0.00297958
0.145833	-0.00035842	-0.00339093
0.15	-0.000339126	-0.00367344
0.154167	-0.000337118	-0.0037731
0.158333	-0.000396707	-0.00382492
0.1625	-0.000430093	-0.00405433
0.166667	-0.000401073	-0.00441465
0.170833	-0.00032766	-0.0043147
0.175	-0.0002892	-0.00422318
0.179167	-0.000321772	-0.0044859
0.183333	-0.000343408	-0.0044142
0.1875	-0.000322625	-0.00357445
0.191667	-0.000312554	-0.00310217
0.195833	-0.000295639	-0.00355449
0.2	-0.000289505	-0.00428193
0.204167	-0.000336581	-0.00442173
0.208333	-0.000390351	-0.00436507
0.2125	-0.000404285	-0.00449434
0.216667	-0.000383687	-0.00466026
0.220833	-0.000294945	-0.0045872
0.225	-0.000285282	-0.0043561
0.229167	-0.000306806	-0.00442048
0.233333	-0.000323846	-0.00449536
0.2375	-0.000319848	-0.0043634
0.241667	-0.00034686	-0.00434547
0.245833	-0.000398009	-0.00434733
0.25	-0.000371925	-0.00430825
0.254167	-0.000328839	-0.00428995
0.258333	-0.000338339	-0.00436149
0.2625	-0.000346431	-0.00477027
0.266667	-0.000339703	-0.00500565
0.270833	-0.000311526	-0.00469046
0.275	-0.000273661	-0.00457068
0.279167	-0.000288564	-0.00468856
0.283333	-0.000294523	-0.00468431
0.2875	-0.000293927	-0.00441163
0.291667	-0.000331304	-0.00418629
0.295833	-0.000363186	-0.00425099
0.3	-0.000345967	-0.00437242
0.304167	-0.000280771	-0.00417484
0.308333	-0.000271894	-0.00398464
0.3125	-0.000339866	-0.00389719
0.316667	-0.000354479	-0.0041572
0.320833	-0.000327158	-0.00454495
0.325	-0.000337376	-0.00456646
0.329167	-0.000352198	-0.00458409
0.333333	-0.000319425	-0.00475595
0.3375	-0.000277225	-0.00447303
0.341667	-0.000293242	-0.00427283
0.345833	-0.000334862	-0.00452188
0.35	-0.000323263	-0.00465437
0.354167	-0.000280148	-0.00442261
0.358333	-0.000300293	-0.00393988
0.3625	-0.00032931	-0.00383446
0.366667	-0.000272764	-0.00423388
0.370833	-0.000199544	-0.00426991
0.375	-0.000233403	-0.00396971
0.379167	-0.000316989	-0.00397401
0.383333	-0.000292397	-0.00439088
0.3875	-0.000241904	-0.00459975
0.391667	-0.000287804	-0.00445054
0.395833	-0.000337199	-0.00445418
0.4	-0.000335133	-0.00456481
0.404167	-0.00029973	-0.00446668
0.408333	-0.000330894	-0.00439545
0.4125	-0.000359124	-0.00433602
0.416667	-0.000315661	-0.00450748
0.420833	-0.000100502	-0.00472421
0.425	8.50018e-08	-0.00458053
0.429167	-0.000104757	-0.00451835
0.433333	-0.000282857	-0.00472091
0.4375	-0.00026745	-0.00469727
0.441667	-0.000261742	-0.00465352
0.445833	-0.000310224	-0.00480829
0.45	-0.000312038	-0.00488907
0.454167	-0.000279292	-0.00475318
0.458333	-0.000278823	-0.00454998
0.4625	-0.000286304	-0.00470032
0.466667	-0.00029546	-0.00510182
0.470833	-0.000317838	-0.00487593
0.475	-0.000358376	-0.00433437
0.479167	-0.000374027	-0.00443672
0.483333	-0.000356168	-0.00493925
0.4875	-0.000304777	-0.00505741
0.491667	-0.00026517	-0.00468404
0.495833	-0.000238727	-0.00437871
0.5	-0.000226516	-0.00437477
0.504167	-0.000245011	-0.00430466
0.508333	-0.000277043	-0.0042062
0.5125	-0.000321144	-0.00434639
0.516667	-0.000260167	-0.00477066
0.520833	-0.000211756	-0.00502768
0.525	-0.000260948	-0.00501937
0.529167	-0.000306092	-0.00497957
0.533333	-0.000297146	-0.0049191
0.5375	-0.000287218	-0.0047641
0.541667	-0.000295144	-0.00462216
0.545833	-0.000284301	-0.00444414
0.55	-0.000233978	-0.00458853
0.554167	-0.000166974	-0.0049022
0.558333	-0.00018295	-0.00470627
0.5625	-0.000158083	-0.00458285
0.566667	-0.000103597	-0.00485874
0.570833	-0.000130927	-0.00478414
0.575	-0.000211822	-0.00439055
0.579167	-0.000275873	-0.00419954
0.583333	-0.000305721	-0.00449497
0.5875	-0.000304863	-0.00480576
0.591667	-0.000271207	-0.00461358
0.595833	-0.000229524	-0.00474188
0.6	-0.000194702	-0.00502758
0.604167	-0.000200159	-0.00495198
0.608333	-0.000207743	-0.00470459
0.6125	-0.000266007	-0.00480709
0.616667	-0.000325878	-0.00502047
0.620833	-0.000335029	-0.00497692
0.625	-0.000334321	-0.00440947
0.629167	-0.000305708	-0.00428034
0.633333	-0.000286239	-0.00463871
0.6375	-0.000258635	-0.00474686
0.641667	-0.000251127	-0.00452255
0.645833	-0.000280882	-0.00456735
0.65	-0.000305923	-0.00479436
0.654167	-0.000296934	-0.00498651
0.658333	-0.000311204	-0.00455435
0.6625	-0.000334577	-0.00429731
0.666667	-0.0003447	-0.00458216
0.670833	-0.000309784	-0.00491969
0.675	-0.000299634	-0.00486533
0.679167	-0.000343443	-0.00481862
0.683333	-0.000354806	-0.00489414
0.6875	-0.000329375	-0.00491437
0.691667	-0.000348034	-0.00456371
0.695833	-0.000354209	-0.00437397
0.7	-0.000360493	-0.00441545
0.704167	-0.000328561	-0.00466999
0.708333	-0.000316139	-0.00477876
0.7125	-0.00033893	-0.00469018
0.716667	-0.000339536	-0.00479074
0.720833	-0.000286533	-0.00506815
0.725	-0.00029454	-0.00495298
0.729167	-0.000321899	-0.00486576
0.733333	-0.000317684	-0.00515826
0.7375	-0.000310162	-0.005336
0.741667	-0.000309812	-0.00520633
0.745833	-0.00034507	-0.00493544
0.75	-0.000355007	-0.0048725
0.754167	-0.000307742	-0.00504534
0.758333	-0.000280301	-0.00486463
0.7625	-0.000289575	-0.00469851
0.766667	-0.000332791	-0.00498494
0.770833	-0.000326862	-0.00530626
0.775	-0.00025369	-0.00546076
0.779167	-0.000251535	-0.00534148
0.783333	-0.000305213	-0.00516152
0.7875	-0.000298188	-0.00515035
0.791667	-0.000295028	-0.0050058
0.795833	-0.000335572	-0.00509113
0.8	-0.000386278	-0.00541536
0.804167	-0.000362739	-0.00538614
0.808333	-0.000307417	-0.00525066
0.8125	-0.000282365	-0.00530794
0.816667	-0.000278832	-0.00552645
0.820833	-0.000269072	-0.00569185
0.825	-0.00029955	-0.00551191
0.829167	-0.000327744	-0.00555408
0.833333	-0.000313321	-0.005723
0.8375	-0.000282905	-0.00585753
0.841667	-0.000272968	-0.00574948
0.845833	-0.000317078	-0.00536122
0.85	-0.000343197	-0.00533002
0.854167	-0.0003198	-0.00576443
0.858333	-0.000307315	-0.00567233
0.8625	-0.000305282	-0.00532019
0.866667	-0.000307376	-0.00557836
0.870833	-0.000300075	-0.00594783
0.875	-0.000269356	-0.00569251
0.879167	-0.000243886	-0.00546467
0.883333	-0.000239961	-0.00556598
0.8875	-0.000265248	-0.00587149
0.891667	-0.000274642	-0.00592821
0.895833	-0.000268008	-0.00595902
0.9	-0.000326194	-0.00611049
0.904167	-0.000325487	-0.00622822
0.908333	-0.000274627	-0.00599137
0.9125	-0.000291143	-0.0055847
0.916667	-0.000354338	-0.00579784
0.920833	-0.000316667	-0.00636989
0.925	-0.000301363	-0.00632358
0.929167	-0.000328424	-0.00583459
0.933333	-0.000359792	-0.00600117
0.9375	-0.000356788	-0.00634194
0.941667	-0.000338156	-0.0062415
0.945833	-0.00034197	-0.00577238
0.95	-0.000323596	-0.00574537
0.954167	-0.000270868	-0.00618418
0.958333	-0.00027305	-0.00632291
0.9625	-0.000317136	-0.00604577
0.966667	-0.000360069	-0.00595035
0.970833	-0.000330805	-0.00607581
0.975	-0.000259558	-0.00606324
0.979167	-0.000252268	-0.0059173
0.983333	-0.000267321	-0.00602336
0.9875	-0.000289919	-0.00651127
0.991667	-0.000295759	-0.00651273
0.995833	-0.000312665	-0.00599996
1	-0.000353401	-0.00571455
1.00417	-0.000377176	-0.00595197
1.00833	-0.000380701	-0.0062223
1.0125	-0.000386015	-0.00606648
1.01667	-0.00036126	-0.00598815
1.02083	-0.000308819	-0.00625695
1.025	-0.000270963	-0.00643643
1.02917	-0.000248493	-0.00647457
1.03333	-0.000299199	-0.00632322
1.0375	-0.000331456	-0.0062896
1.04167	-0.000275224	-0.00620079
1.04583	-0.000289336	-0.00615772
1.05	-0.000316292	-0.00620395
1.05417	-0.000295512	-0.00647637
1.05833	-0.000284491	-0.00652964
1.0625	-0.000333846	-0.00643586
1.06667	-0.000380853	-0.00648734
1.07083	-0.000383745	-0.00653072
1.075	-0.000349612	-0.00631363
1.07917	-0.000358686	-0.00604964
1.08333	-0.00034444	-0.00606338
1.0875	-0.000299812	-0.00640854
1.09167	-0.000280811	-0.00649527
1.09583	-0.000260634	-0.00622645
1.1	-0.000289725	-0.00610464
1.10417	-0.00031931	-0.00632605
1.10833	-0.000301224	-0.00647611
1.1125	-0.000317959	-0.00620874
1.11667	-0.000354208	-0.00597827
1.12083	-0.000318617	-0.00617351
1.125	-0.000285119	-0.00621686
1.12917	-0.000309931	-0.00610415
1.13333	-0.000323944	-0.00614564
1.1375	-0.00028029	-0.00627612
1.14167	-0.000220966	-0.00638029
1.14583	-0.000247935	-0.00635518
1.15	-0.000314552	-0.00636451
1.15417	-0.000337308	-0.00657957
1.15833	-0.000303102	-0.00674741
1.1625	-0.00026213	-0.00668982
1.16667	-0.000267893	-0.00652211
1.17083	-0.000293307	-0.00667917
1.175	-0.000304658	-0.00675236
1.17917	-0.000349217	-0.00664344
1.18333	-0.000345872	-0.00653296
1.1875	-0.000224676	-0.00661465
1.19167	-0.000171624	-0.00637756
1.19583	-0.000235828	-0.00633155
1.2	-0.00029462	-0.00650361
1.20417	-0.000306593	-0.00663235
1.20833	-0.000305525	-0.00658367
1.2125	-0.000302872	-0.00637512
1.21667	-0.000326048	-0.00629996
1.22083	-0.000335758	-0.0064781
1.225	-0.000313928	-0.00658106
1.22917	-0.000271353	-0.00672811
1.23333	-0.000263729	-0.0070181
1.2375	-0.000260499	-0.00717731
1.24167	-0.000240369	-0.00702946
1.24583	-0.000292981	-0.00671318
1.25	-0.000373671	-0.00656106
1.25417	-0.000356618	-0.00682151
1.25833	-0.000318257	-0.00690755
1.2625	-0.000333678	-0.00673878
1.26667	-0.000371128	-0.00656883
1.27083	-0.000303628	-0.0067692
1.275	-0.000200911	-0.00696244
1.27917	-0.000184348	-0.00677642
1.28333	-0.000259782	-0.00666838
1.2875	-0.000308307	-0.00686214
1.29167	-0.000312429	-0.00688768
1.29583	-0.000285922	-0.00691404
1.3	-0.00032741	-0.0069129
1.30417	-0.000325081	-0.00682911
1.30833	-0.000275675	-0.00698242
1.3125	-0.000256903	-0.00690711
1.31667	-0.000283175	-0.00680497
1.32083	-0.000305079	-0.00702115
1.325	-0.000275755	-0.00714046
1.32917	-0.00026484	-0.00687231
1.33333	-0.000330607	-0.00669612
1.3375	-0.000375374	-0.00684671
1.34167	-0.000308494	-0.00700829
1.34583	-0.000253343	-0.0070097
1.35	-0.000251849	-0.00698564
1.35417	-0.000246262	-0.0072029
1.35833	-0.000252936	-0.0072601
1.3625	-0.000260746	-0.00713279
1.36667	-0.000284964	-0.00696548
1.37083	-0.000278679	-0.00692637
1.375	-0.000206285	-0.00702952
1.37917	-0.000170089	-0.00687681
1.38333	-0.00011375	-0.00681059
1.3875	-0.000102764	-0.00711543
1.39167	-0.000147596	-0.00732767
1.39583	-0.000215544	-0.0072629
1.4	-0.000230621	-0.00701333
1.40417	-0.000237588	-0.00682637
1.40833	-0.000193749	-0.00685263
1.4125	-0.000181031	-0.00671149
1.41667	-0.000213298	-0.00648213
1.42083	-0.000202802	-0.00671846
1.425	-0.000168481	-0.00698021
1.42917	-0.000135374	-0.0070949
1.43333	-0.000145509	-0.00695902
1.4375	-0.000144522	-0.00674742
1.44167	-0.000123753	-0.00673033
1.44583	-0.000115546	-0.00670102
1.45	-0.000113006	-0.0067117
1.45417	-9.43058e-05	-0.00688003
1.45833	-6.63588e-05	-0.00676756
1.4625	-2.98272e-05	-0.00665326
1.46667	-1.62323e-05	-0.00665394
1.47083	-2.48165e-05	-0.0067448
1.475	3.58437e-05	-0.00697749
1.47917	7.0436e-05	-0.00686439
1.48333	5.54367e-05	-0.00657484
1.4875	3.3424e-05	-0.00655652
1.49167	6.24596e-05	-0.00664507
1.49583	0.000117846	-0.00657902
1.5	0.000139277	-0.00657497
1.50417	0.000155582	-0.00679208
1.50833	0.000198382	-0.00715892
1.5125	0.000188118	-0.00709903
1.51667	0.00013641	-0.00658709
1.52083	0.000135413	-0.00661875
1.525	0.000195182	-0.00688055
1.52917	0.000281871	-0.00698198
1.53333	0.0003012	-0.00688898
1.5375	0.000284703	-0.0067612
1.54167	0.000316225	-0.00686466
1.54583	0.000316997	-0.00686632
1.55	0.000291602	-0.00676918
1.55417	0.000282274	-0.00697679
1.55833	0.000283867	-0.00725146
1.5625	0.000299998	-0.00738605
1.56667	0.000279882	-0.00722644
1.57083	0.000277917	-0.0070768
1.575	0.000361979	-0.00712969
1.57917	0.000408235	-0.00699223
1.58333	0.000336827	-0.00680143
1.5875	0.0002998	-0.00699626
1.59167	0.000357329	-0.00707793
1.59583	0.000395444	-0.00693538
1.6	0.000345507	-0.00687324
1.60417	0.000330458	-0.0069253
1.60833	0.000394197	-0.00702726
1.6125	0.000437629	-0.00684488
1.61667	0.000379025	-0.00678579
1.62083	0.000332303	-0.00721115
1.625	0.000347414	-0.00745737
1.62917	0.0003603	-0.00723633
1.63333	0.000308592	-0.00704994
1.6375	0.000262951	-0.00688589
1.64167	0.000314466	-0.00699468
1.64583	0.000371535	-0.00704033
1.65	0.000356713	-0.00685977
1.65417	0.000289886	-0.00702079
1.65833	0.000242565	-0.00724081
1.6625	0.000234155	-0.00735551
1.66667	0.000241874	-0.00734373
1.67083	0.00020286	-0.00749195
1.675	0.000199572	-0.00781773
1.67917	0.000195968	-0.00774752
1.68333	0.000184145	-0.00741362
1.6875	0.000165555	-0.00739644
1.69167	0.000165395	-0.0076354
1.69583	0.000188687	-0.00763176
1.7	0.00019863	-0.00753808
1.70417	0.000175414	-0.0074699
1.70833	0.00018752	-0.00748171
1.7125	0.000193774	-0.00728279
1.71667	0.000158548	-0.00731009
1.72083	9.15233e-05	-0.0078813
1.725	8.54546e-05	-0.00802053
1.72917	8.74347e-05	-0.00770959
1.73333	7.05835e-05	-0.00737014
1.7375	4.67955e-05	-0.00739041
1.74167	6.92492e-05	-0.0077427
1.74583	6.24015e-05	-0.0079514
1.75	2.89258e-05	-0.00775146
1.75417	2.69013e-06	-0.00769387
1.75833	1.45779e-05	-0.00763313
1.7625	4.8434e-05	-0.00787242
1.76667	7.44941e-05	-0.0080819
1.77083	5.41566e-05	-0.00796879
1.775	5.34681e-05	-0.00794588
1.77917	6.14966e-05	-0.0078002
1.78333	4.98507e-05	-0.00756611
1.7875	2.53494e-05	-0.0076995
1.79167	5.68456e-05	-0.00798132
1.79583	8.28083e-05	-0.0077951
1.8	6.0205e-05	-0.00757003
1.80417	1.99468e-05	-0.00752859
1.80833	2.73953e-05	-0.0078409
1.8125	1.30213e-05	-0.00792243
1.81667	-1.46657e-05	-0.0077985
1.82083	-2.87507e-05	-0.00779391
1.825	-1.9183e-05	-0.00770969
1.82917	6.2541e-05	-0.00766366
1.83333	6.55234e-05	-0.00765618
1.8375	-7.78766e-09	-0.0077421
1.84167	-1.58414e-05	-0.0078268
1.84583	-1.16406e-05	-0.00785309
1.85	4.23064e-06	-0.00772716
1.85417	5.43848e-05	-0.00784523
1.85833	6.39375e-05	-0.00801222
1.8625	3.91814e-05	-0.00802165
1.86667	1.1619e-05	-0.00784469
1.87083	-2.51321e-05	-0.0079919
1.875	-1.16199e-05	-0.00827309
1.87917	5.07334e-05	-0.00837559
1.88333	8.67133e-05	-0.00800374
1.8875	6.97191e-05	-0.00774681
1.89167	3.75777e-05	-0.00764944
1.89583	4.7514e-05	-0.00788824
1.9	2.73375e-05	-0.00788527
1.90417	2.24701e-05	-0.00784512
1.90833	4.84095e-05	-0.00800507
1.9125	7.40646e-05	-0.00806346
1.91667	8.6751e-05	-0.00790698
1.92083	9.53502e-05	-0.00786938
1.925	0.00010062	-0.00780518
1.92917	0.000126755	-0.00786604
1.93333	9.21904e-05	-0.00799519
1.9375	6.2355e-05	-0.00808587
1.94167	8.96527e-05	-0.00816556
1.94583	0.000117259	-0.00813488
1.95	0.000123568	-0.00808953
1.95417	0.000121514	-0.00813094
1.95833	0.000118288	-0.00819186
1.9625	0.000114093	-0.00824238
1.96667	0.000112013	-0.00810539
1.97083	0.000135654	-0.00792327
1.975	0.000192347	-0.00818597
1.97917	0.000229599	-0.00839111
1.98333	0.000242053	-0.00827351
1.9875	0.000261326	-0.00828779
1.99167	0.000277972	-0.00835454
1.99583	0.000310878	-0.00826288
2	0.000343262	-0.00807895
2.00417	0.000322637	-0.00801064
2.00833	0.000296294	-0.0083308
2.0125	0.000319804	-0.00844984
2.01667	0.000350459	-0.00811814
2.02083	0.000330721	-0.00792877
2.025	0.000331679	-0.00814594
2.02917	0.000379382	-0.00831211
2.03333	0.000386518	-0.00813885
2.0375	0.000389096	-0.00797383
2.04167	0.000464387	-0.00829506
2.04583	0.000535278	-0.00845605
2.05	0.000560628	-0.00797269
2.05417	0.000491047	-0.00768927
2.05833	0.000450901	-0.00798907
2.0625	0.000509308	-0.00835003
2.06667	0.000593751	-0.00833047
2.07083	0.000633171	-0.00796571
2.075	0.000644702	-0.00796405
2.07917	0.000657281	-0.00809525
2.08333	0.000604869	-0.00785648
2.0875	0.000552555	-0.00778004
2.09167	0.000545439	-0.00792683
2.09583	0.000635053	-0.00807264
2.1	0.000697076	-0.00782312
2.10417	0.000681617	-0.00767423
2.10833	0.0006921	-0.00796031
2.1125	0.00076015	-0.00819617
2.11667	0.0008059	-0.00788358
2.12083	0.000811595	-0.0078145
2.125	0.000803651	-0.00800469
2.12917	0.000856282	-0.00820914
2.13333	0.000859698	-0.00811295
2.1375	0.000813676	-0.00812072
2.14167	0.000820556	-0.0086948
2.14583	0.000868922	-0.00892282
2.15	0.000902954	-0.00846374
2.15417	0.000893573	-0.0081944
2.15833	0.000896024	-0.00840826
2.1625	0.000962961	-0.00861224
2.16667	0.00100992	-0.00856575
2.17083	0.000984115	-0.00849975
2.175	0.000972074	-0.00851674
2.17917	0.00101068	-0.00812377
2.18333	0.00106275	-0.00730833
2.1875	0.00107888	-0.00717365
2.19167	0.00107344	-0.00801333
2.19583	0.00111683	-0.00854589
2.2	0.00115945	-0.00836498
2.20417	0.001156	-0.00806916
2.20833	0.00119606	-0.00811849
2.2125	0.00126654	-0.00835243
2.21667	0.00133694	-0.00842884
2.22083	0.00135478	-0.00810625
2.225	0.00136812	-0.00697378
2.22917	0.00142599	-0.00672888
2.23333	0.00145599	-0.0074117
2.2375	0.001419	-0.00807817
2.24167	0.00145395	-0.0083756
2.24583	0.00159647	-0.00859296
2.25	0.00174933	-0.00847078
2.25417	0.00178221	-0.00825214
2.25833	0.00177045	-0.00829178
2.2625	0.0018912	-0.00847343
2.26667	0.00203779	-0.00845826
2.27083	0.00208064	-0.0082891
2.275	0.00211599	-0.00856568
2.27917	0.00219319	-0.00892117
2.28333	0.00234386	-0.00895444
2.2875	0.00244291	-0.00869398
2.29167	0.00252119	-0.00857038
2.29583	0.00267809	-0.00848295
2.3	0.00287936	-0.00838326
2.30417	0.00300286	-0.00829134
2.30833	0.00310289	-0.00852715
2.3125	0.00323939	-0.00866348
2.31667	0.00346272	-0.00823409
2.32083	0.00369289	-0.00738446
2.325	0.00384176	-0.00744711
2.32917	0.00400277	-0.00845968
2.33333	0.00418891	-0.00884325
2.3375	0.00439027	-0.00867086
2.34167	0.00461319	-0.00882127
2.34583	0.00484215	-0.00888483
2.35	0.00509577	-0.00856189
2.35417	0.00535187	-0.00828658
2.35833	0.00562052	-0.00820612
2.3625	0.00592488	-0.00817882
2.36667	0.0062644	-0.00811829
2.37083	0.00659736	-0.00792379
2.375	0.00698186	-0.00810852
2.37917	0.00742464	-0.00836931
2.38333	0.00784971	-0.00824962
2.3875	0.00813796	-0.00786627
2.39167	0.00839779	-0.00756496
2.39583	0.00882215	-0.00790375
2.4	0.00931082	-0.0082159
2.40417	0.00973608	-0.00788892
2.40833	0.0101456	-0.00766622
2.4125	0.0106611	-0.00767472
2.41667	0.0112987	-0.00764175
2.42083	0.0119163	-0.00762122
2.425	0.0124766	-0.00775873
2.42917	0.0131252	-0.00793682
2.43333	0.0138368	-0.00779554
2.4375	0.014528	-0.00719207
2.44167	0.0152443	-0.0068794
2.44583	0.016036	-0.00697473
2.45	0.0168492	-0.00710791
2.45417	0.0177258	-0.00700008
2.45833	0.0186919	-0.00671703
2.4625	0.0196018	-0.00642467
2.46667	0.0204268	-0.00611414
2.47083	0.0213004	-0.00581145
2.475	0.0222546	-0.00609487
2.47917	0.0232291	-0.00638076
2.48333	0.0242417	-0.0062155
2.4875	0.0252671	-0.00578539
2.49167	0.0263393	-0.00537199
2.49583	0.0274701	-0.00484483
2.5	0.028641	-0.00438748
2.50417	0.0298173	-0.00424962
2.50833	0.0310201	-0.00424398
2.5125	0.0323024	-0.00424718
2.51667	0.0336848	-0.00408064
2.52083	0.0350729	-0.00365812
2.525	0.0364503	-0.00318034
2.52917	0.0379177	-0.00311322
2.53333	0.0394759	-0.00292326
2.5375	0.0410522	-0.00240851
2.54167	0.0426971	-0.00227319
2.54583	0.0444189	-0.00206878
2.55	0.0462206	-0.00147708
2.55417	0.0481188	-0.00083344
2.55833	0.0500977	-0.000426777
2.5625	0.0522662	-0.000259533
2.56667	0.0546852	0.000143548
2.57083	0.0573516	0.00110778
2.575	0.0603722	0.00200133
2.57917	0.0638305	0.00252067
2.58333	0.0678448	0.00319482
2.5875	0.0724669	0.00413608
2.59167	0.0777601	0.00534984
2.59583	0.0838739	0.00631967
2.6	0.0908007	0.00763916
2.60417	0.09847	0.00980799
2.60833	0.106899	0.0117384
2.6125	0.116037	0.0136147
2.61667	0.125707	0.0159078
2.62083	0.135604	0.0188457
2.625	0.145604	0.0217698
2.62917	0.155668	0.0245128
2.63333	0.165568	0.0274731
2.6375	0.175052	0.0310288
2.64167	0.183971	0.0343157
2.64583	0.192352	0.03732
2.65	0.200127	0.0406365
2.65417	0.207267	0.0439774
2.65833	0.213754	0.0467023
2.6625	0.219611	0.0490462
2.66667	0.224798	0.0512391
2.67083	0.22939	0.0535199
2.675	0.233443	0.0555877
2.67917	0.237021	0.0575396
2.68333	0.240211	0.0593555
2.6875	0.242992	0.061212
2.69167	0.245396	0.0631491
2.69583	0.247565	0.0647902
2.7	0.249554	0.0660513
2.70417	0.251315	0.0675487
2.70833	0.252906	0.0691359
2.7125	0.254415	0.0706982
2.71667	0.255932	0.0723502
2.72083	0.257397	0.0743916
2.725	0.258772	0.0767217
2.72917	0.260202	0.0789332
2.73333	0.261696	0.0809945
2.7375	0.263243	0.0834884
2.74167	0.264796	0.0860152
2.74583	0.2664	0.0883503
2.75	0.268084	0.090833
2.75417	0.269845	0.0937171
2.75833	0.271662	0.0966194
2.7625	0.273651	0.0990094
2.76667	0.275804	0.101356
2.77083	0.278027	0.104021
2.775	0.28034	0.106621
2.77917	0.282773	0.108992
2.78333	0.285419	0.111384
2.7875	0.288291	0.113983
2.79167	0.291341	0.116598
2.79583	0.294591	0.119088
2.8	0.297978	0.121736
2.80417	0.301479	0.124653
2.80833	0.305217	0.127382
2.8125	0.309255	0.130079
2.81667	0.313605	0.132864
2.82083	0.318205	0.136076
2.825	0.323077	0.139331
2.82917	0.328389	0.14246
2.83333	0.334096	0.145868
2.8375	0.340134	0.14961
2.84167	0.346567	0.153284
2.84583	0.353452	0.157116
2.85	0.360866	0.160997
2.85417	0.368824	0.165232
2.85833	0.3773	0.169692
2.8625	0.386437	0.174315
2.86667	0.39648	0.17893
2.87083	0.40771	0.183821
2.875	0.420412	0.18899
2.87917	0.435073	0.194697
2.88333	0.452591	0.2006
2.8875	0.473834	0.206361
2.89167	0.49949	0.212133
2.89583	0.530011	0.218184
2.9	0.565194	0.22461
2.90417	0.604196	0.231785
2.90833	0.645749	0.239283
2.9125	0.688399	0.247089
2.91667	0.73082	0.255624
2.92083	0.771726	0.265571
2.925	0.810084	0.277314
2.92917	0.845308	0.29104
2.93333	0.877005	0.307964
2.9375	0.90498	0.329541
2.94167	0.929248	0.356205
2.94583	0.949849	0.388403
2.95	0.9668	0.426715
2.95417	0.980101	0.471812
2.95833	0.989762	0.523248
2.9625	0.996112	0.57915
2.96667	0.999478	0.637225
2.97083	1	0.695585
2.975	0.997877	0.751794
2.97917	0.993285	0.804234
2.98333	0.986394	0.851438
2.9875	0.977362	0.892638
2.99167	0.966411	0.927101
2.99583	0.953869	0.954528
3	0.939982	0.975176
3.00417	0.924837	0.989852
3.00833	0.908527	0.99882
3.0125	0.891136	1.00205
3.01667	0.872939	0.999997
3.02083	0.854114	0.99368
3.025	0.834702	0.983787
3.02917	0.814801	0.970046
3.03333	0.794519	0.953027
3.0375	0.773928	0.93355
3.04167	0.753127	0.911974
3.04583	0.732167	0.888141
3.05	0.711257	0.862534
3.05417	0.690476	0.83604
3.05833	0.669823	0.808965
3.0625	0.649405	0.780634
3.06667	0.629283	0.751284
3.07083	0.60943	0.722182
3.075	0.589851	0.693062
3.07917	0.570646	0.663867
3.08333	0.55192	0.634584
3.0875	0.533646	0.605725
3.09167	0.515667	0.577711
3.09583	0.498082	0.550485
3.1	0.48096	0.523762
3.10417	0.464299	0.497997
3.10833	0.448049	0.473119
3.1125	0.432195	0.449275
3.11667	0.416815	0.426295
3.12083	0.401856	0.404711
3.125	0.387255	0.384513
3.12917	0.373137	0.365283
3.13333	0.359541	0.346932
3.1375	0.34638	0.329652
3.14167	0.333627	0.313511
3.14583	0.321287	0.29825
3.15	0.309451	0.283804
3.15417	0.298116	0.270398
3.15833	0.287213	0.258166
3.1625	0.276741	0.246263
3.16667	0.266781	0.234717
3.17083	0.257295	0.224061
3.175	0.248192	0.214205
3.17917	0.239463	0.204924
3.18333	0.231198	0.195943
3.1875	0.223365	0.187281
3.19167	0.215796	0.179355
3.19583	0.208462	0.171833
3.2	0.201436	0.164453
3.20417	0.194726	0.157404
3.20833	0.188243	0.150739
3.2125	0.181959	0.144484
3.21667	0.175884	0.1385
3.22083	0.169975	0.132476
3.225	0.164104	0.126964
3.22917	0.158353	0.121606
3.23333	0.152784	0.116423
3.2375	0.147376	0.111591
3.24167	0.142155	0.107103
3.24583	0.137195	0.102851
3.25	0.132172	0.0988064
3.25417	0.127103	0.0948425
3.25833	0.122264	0.0913075
3.2625	0.117615	0.0879971
3.26667	0.11305	0.0848
3.27083	0.108717	0.0823454
3.275	0.104608	0.0801481
3.27917	0.10064	0.0778751
3.28333	0.0968563	0.0754678
3.2875	0.0932929	0.0735509
3.29167	0.0898532	0.0719927
3.29583	0.0865557	0.0705419
3.3	0.083449	0.0688853
3.30417	0.0805306	0.0673526
3.30833	0.0777495	0.0657234
3.3125	0.0750853	0.0642952
3.31667	0.0726259	0.0626712
3.32083	0.0702923	0.0607907
3.325	0.0680189	0.0588299
3.32917	0.0658621	0.056838
3.33333	0.0638247	0.0549709
3.3375	0.0618446	0.0531636
3.34167	0.0599462	0.0511272
3.34583	0.0581005	0.0488233
3.35	0.0563049	0.0463636
3.35417	0.0545624	0.0440582
3.35833	0.0528761	0.042064
3.3625	0.0512143	0.0398717
3.36667	0.0495485	0.0373704
3.37083	0.0479571	0.0351027
3.375	0.0464594	0.033228
3.37917	0.044949	0.0312129
3.38333	0.0434999	0.0289669
3.3875	0.0421518	0.0270382
3.39167	0.0408108	0.0256314
3.39583	0.0394601	0.0245039
3.4	0.0381936	0.0229057
3.40417	0.0370384	0.0210327
3.40833	0.0359549	0.0193874
3.4125	0.0348345	0.0182352
3.41667	0.0337341	0.0170389
3.42083	0.0327361	0.0157696
3.425	0.0317788	0.0149151
3.42917	0.0308278	0.0141302
3.43333	0.0299059	0.0129923
3.4375	0.0290733	0.0119489
3.44167	0.0283013	0.0113166
3.44583	0.0275253	0.0108564
3.45	0.026803	0.0101168
3.45417	0.0261999	0.00957596
3.45833	0.0255758	0.00950865
3.4625	0.0249323	0.00916726
3.46667	0.0243115	0.00829779
3.47083	0.0237464	0.00756529
3.475	0.0232308	0.00715328
3.47917	0.0226779	0.00696257
3.48333	0.022164	0.00669388
3.4875	0.021718	0.00619946
3.49167	0.0212743	0.00580335
3.49583	0.0208563	0.00554815
3.5	0.0204259	0.00532947
3.50417	0.0200004	0.00520624
3.50833	0.0196292	0.00512711
3.5125	0.0193047	0.00490563
3.51667	0.0191698	0.00431406
3.52083	0.0188985	0.00389288
3.525	0.0183271	0.0038068
3.52917	0.0178099	0.00381535
3.53333	0.0175067	0.00349365
3.5375	0.0172367	0.00319744
3.54167	0.0169201	0.0028262
3.54583	0.0165459	0.00254862
3.55	0.0162132	0.00225103
3.55417	0.0159752	0.00201375
3.55833	0.0157279	0.00213012
3.5625	0.0154543	0.0022435
3.56667	0.0151587	0.00198853
3.57083	0.0149027	0.00150001
3.575	0.0146954	0.00123337
3.57917	0.0144307	0.00131547
3.58333	0.0141174	0.00109318
3.5875	0.0138794	0.000756306
3.59167	0.0136994	0.000884366
3.59583	0.0134816	0.00101439
3.6	0.0132396	0.000967673
3.60417	0.013024	0.000838068
3.60833	0.0128412	0.000562897
3.6125	0.0126159	0.000234604
3.61667	0.012374	-0.000137981
3.62083	0.0122155	-0.00040459
3.625	0.0120643	-0.000479138
3.62917	0.0119021	-0.000500206
3.63333	0.011715	-0.000694692
3.6375	0.0115479	-0.000861246
3.64167	0.0113844	-0.000859247
3.64583	0.0111677	-0.000816435
3.65	0.0109797	-0.000835121
3.65417	0.0108656	-0.00114316
3.65833	0.0107469	-0.00121173
3.6625	0.0105861	-0.00128063
3.66667	0.0104192	-0.00164105
3.67083	0.010278	-0.00178472
3.675	0.0101841	-0.00180937
3.67917	0.00998549	-0.00174962
3.68333	0.00980348	-0.00183388
3.6875	0.00968212	-0.00189972
3.69167	0.00958027	-0.00191843
3.69583	0.00944235	-0.00208946
3.7	0.00929136	-0.00246732
3.70417	0.00916763	-0.00265756
3.70833	0.00906539	-0.00255468
3.7125	0.00891689	-0.00234142
3.71667	0.0087537	-0.00242349
3.72083	0.00865708	-0.0025999
3.725	0.00859504	-0.00265909
3.72917	0.00849618	-0.00272028
3.73333	0.00837654	-0.00284999
3.7375	0.00825116	-0.00313102
3.74167	0.00813693	-0.00338031
3.74583	0.00797213	-0.00342597
3.75	0.00780872	-0.00353128
3.75417	0.00770939	-0.00389635
3.75833	0.00763299	-0.00393355
3.7625	0.00755932	-0.00357721
3.76667	0.00741631	-0.00361708
3.77083	0.00727556	-0.00407018
3.775	0.00719324	-0.0043011
3.77917	0.00710937	-0.00397864
3.78333	0.00698537	-0.0036632
3.7875	0.00689515	-0.00376814
3.79167	0.00679149	-0.0039694
3.79583	0.00668267	-0.00407059
3.8	0.00656932	-0.00439599
3.80417	0.00650129	-0.00473513
3.80833	0.0064463	-0.00471856
3.8125	0.00634588	-0.00439147
3.81667	0.00622172	-0.00459171
3.82083	0.00615947	-0.00497906
3.825	0.00613312	-0.00507912
3.82917	0.00604595	-0.00507154
3.83333	0.00591614	-0.00514565
3.8375	0.00579569	-0.00525565
3.84167	0.0057053	-0.0053714
3.84583	0.00562251	-0.00524269
3.85	0.00555421	-0.00533956
3.85417	0.00550739	-0.00563669
3.85833	0.00547677	-0.00551388
3.8625	0.00541632	-0.0052812
3.86667	0.00530224	-0.00551931
3.87083	0.00520411	-0.005832
3.875	0.00518103	-0.00593276
3.87917	0.00513963	-0.00575316
3.88333	0.00505083	-0.00580314
3.8875	0.0049482	-0.00619286
3.89167	0.00490122	-0.00619075
3.89583	0.00490645	-0.00577996
3.9	0.0048281	-0.00579528
3.90417	0.00476795	-0.00635483
3.90833	0.00473088	-0.00654675
3.9125	0.00463807	-0.00622199
3.91667	0.00448725	-0.0060224
3.92083	0.00440995	-0.00632505
3.925	0.00439534	-0.00661762
3.92917	0.00437498	-0.0064848
3.93333	0.00433066	-0.00644387
3.9375	0.00438157	-0.00674207
3.94167	0.00444388	-0.00693209
3.94583	0.00439881	-0.00671363
3.95	0.00432195	-0.00676673
3.95417	0.00436445	-0.00709931
3.95833	0.00442513	-0.00708942
3.9625	0.00444164	-0.00666496
3.96667	0.00439663	-0.00652953
3.97083	0.00437363	-0.00667368
3.975	0.0044267	-0.00687092
3.97917	0.00443776	-0.00684944
3.98333	0.00442451	-0.00683244
3.9875	0.00442489	-0.00732966
3.99167	0.00445302	-0.00774311
3.99583	0.00445697	-0.00751729
4	0.0043762	-0.007299
4.00417	0.00433657	-0.00741569
4.00833	0.00433627	-0.00744552
4.0125	0.00433128	-0.00718668
4.01667	0.00430098	-0.00703214
4.02083	0.00425926	-0.00726721
4.025	0.00418804	-0.00743259
4.02917	0.00415325	-0.00752557
4.03333	0.00409541	-0.00752516
4.0375	0.00407365	-0.00755019
4.04167	0.0040732	-0.00749907
4.04583	0.00405179	-0.00743695
4.05	0.00396031	-0.00760908
4.05417	0.00385638	-0.00790828
4.05833	0.0038256	-0.00797159
4.0625	0.00382979	-0.00778113
4.06667	0.00375895	-0.00768945
4.07083	0.00369124	-0.00776158
4.075	0.00367198	-0.00787441
4.07917	0.00363104	-0.00779035
4.08333	0.00354506	-0.00773049
4.0875	0.00349766	-0.00795044
4.09167	0.00347617	-0.00796391
4.09583	0.00347685	-0.00774851
4.1	0.0034395	-0.0076886
4.10417	0.00342717	-0.00782944
4.10833	0.00343962	-0.00798883
4.1125	0.00341573	-0.00806034
4.11667	0.0033305	-0.00787896
4.12083	0.00326046	-0.00796653
4.125	0.00324451	-0.0080148
4.12917	0.0032587	-0.00804175
4.13333	0.0032055	-0.00805759
4.1375	0.00312001	-0.00798752
4.14167	0.00309037	-0.00814024
4.14583	0.00306979	-0.0083138
4.15	0.00300775	-0.0083244
4.15417	0.00292017	-0.0084925
4.15833	0.00288043	-0.00853665
4.1625	0.00288595	-0.00837337
4.16667	0.00285442	-0.00813924
4.17083	0.00281474	-0.00836405
4.175	0.00282168	-0.00879336
4.17917	0.00277947	-0.00861456
4.18333	0.00270041	-0.00844947
4.1875	0.00267029	-0.00863756
4.19167	0.00268116	-0.00886394
4.19583	0.00265162	-0.00880765
4.2	0.00255608	-0.00859464
4.20417	0.00246577	-0.00858191
4.20833	0.00245592	-0.00884645
4.2125	0.0024545	-0.0087217
4.21667	0.00240499	-0.00844346
4.22083	0.00236793	-0.0085774
4.225	0.00235344	-0.00889218
4.22917	0.00232498	-0.00914632
4.23333	0.00227387	-0.00915669
4.2375	0.00226997	-0.00924414
4.24167	0.00231583	-0.009333
4.24583	0.00226975	-0.00930023
4.25	0.00215349	-0.00903244
4.25417	0.00208875	-0.00901509
4.25833	0.00206866	-0.0091057
4.2625	0.00205502	-0.00900864
4.26667	0.00205743	-0.00891216
4.27083	0.00204943	-0.00904619
4.275	0.00204336	-0.00939771
4.27917	0.00199652	-0.00936664
4.28333	0.00192192	-0.009094
4.2875	0.00188553	-0.00912025
4.29167	0.00191554	-0.00909
4.29583	0.00196992	-0.0090613
4.3	0.0019309	-0.00912779
4.30417	0.00188151	-0.00929639
4.30833	0.00189667	-0.00949445
4.3125	0.00188211	-0.00947
4.31667	0.00182448	-0.00927754
4.32083	0.001779	-0.00937894
4.325	0.00176738	-0.00950267
4.32917	0.001811	-0.00937175
4.33333	0.00181232	-0.00933452
4.3375	0.00175582	-0.00955628
4.34167	0.00172532	-0.00987036
4.34583	0.00173329	-0.00984151
4.35	0.00172077	-0.00966956
4.35417	0.00166528	-0.00966069
4.35833	0.00161798	-0.00977009
4.3625	0.00161636	-0.00972957
4.36667	0.00160164	-0.00969962
4.37083	0.00157818	-0.00996568
4.375	0.00161633	-0.010171
4.37917	0.00161815	-0.00990609
4.38333	0.00158707	-0.00945601
4.3875	0.00157725	-0.00965346
4.39167	0.00157438	-0.0101505
4.39583	0.00156378	-0.0101364
4.4	0.00151208	-0.00983432
4.40417	0.00146888	-0.00965845
4.40833	0.00148259	-0.00977259
4.4125	0.00147875	-0.00984258
4.41667	0.00141544	-0.0100062
4.42083	0.0013832	-0.0101341
4.425	0.00139586	-0.0102203
4.42917	0.00141661	-0.0101227
4.43333	0.00140398	-0.010117
4.4375	0.0013635	-0.0101467
4.44167	0.00133834	-0.0104521
4.44583	0.00134981	-0.0103916
4.45	0.00136486	-0.0102312
4.45417	0.00134979	-0.0103029
4.45833	0.00133258	-0.00986282
4.4625	0.00132922	-0.00879881
4.46667	0.00129707	-0.00873714
4.47083	0.0012364	-0.00988903
4.475	0.00126129	-0.0106169
4.47917	0.00130259	-0.0106361
4.48333	0.00130189	-0.0102286
4.4875	0.00127725	-0.010035
4.49167	0.00127291	-0.0102697
4.49583	0.00127589	-0.00999694
4.5	0.00124241	-0.0093581
4.50417	0.00119783	-0.00926079
4.50833	0.00120249	-0.010161
4.5125	0.00124549	-0.0107265
4.51667	0.00122245	-0.0106517
4.52083	0.00113432	-0.0107007
4.525	0.00108458	-0.0107523
4.52917	0.00111913	-0.010539
4.53333	0.0011183	-0.0103718
4.5375	0.00107747	-0.0104819
4.54167	0.00109589	-0.0106672
4.54583	0.00111942	-0.0104933
4.55	0.00111427	-0.0101945
4.55417	0.00106087	-0.0100435
4.55833	0.00102049	-0.0100578
4.5625	0.00105484	-0.0102664
4.56667	0.00103852	-0.0103081
4.57083	0.00097268	-0.0103175
4.575	0.000961319	-0.0104846
4.57917	0.000987264	-0.0105767
4.58333	0.000989868	-0.0103415
4.5875	0.000961328	-0.0105409
4.59167	0.000929566	-0.0110052
4.59583	0.000932695	-0.0111829
4.6	0.000924994	-0.0106907
4.60417	0.000884174	-0.010556
4.60833	0.000870355	-0.0109626
4.6125	0.000891697	-0.0112321
4.61667	0.000887949	-0.0108233
4.62083	0.000841455	-0.0104582
4.625	0.000836586	-0.0105912
4.62917	0.000873252	-0.0108708
4.63333	0.0008717	-0.0110796
4.6375	0.000811901	-0.0112331
4.64167	0.000794697	-0.0114408
4.64583	0.000844598	-0.0115321
4.65	0.000855565	-0.0112681
4.65417	0.000817245	-0.0111039
4.65833	0.000769247	-0.011045
4.6625	0.000725118	-0.0111353
4.66667	0.000668072	-0.011056
4.67083	0.000657051	-0.0110527
4.675	0.00067673	-0.0111782
4.67917	0.000699813	-0.0112921
4.68333	0.00072995	-0.0111417
4.6875	0.000737761	-0.0111869
4.69167	0.000747057	-0.0113027
4.69583	0.000744032	-0.0115845
4.7	0.000685598	-0.0117435
4.70417	0.000607849	-0.0116139
4.70833	0.000590048	-0.0114852
4.7125	0.000637657	-0.0115519
4.71667	0.000666846	-0.0116359
4.72083	0.000659791	-0.0116364
4.725	0.000639436	-0.0116509
4.72917	0.000642633	-0.0118246
4.73333	0.000639867	-0.0119062
4.7375	0.000607347	-0.0116513
4.74167	0.000591458	-0.0115204
4.74583	0.000601477	-0.0115018
4.75	0.000591992	-0.0113476
4.75417	0.00058474	-0.0113543
4.75833	0.00057402	-0.0115648
4.7625	0.000589087	-0.0116804
4.76667	0.00059683	-0.0115037
4.77083	0.000551039	-0.0113514
4.775	0.0005277	-0.0115878
4.77917	0.000538283	-0.0116941
4.78333	0.000569728	-0.0116162
4.7875	0.000553465	-0.0116824
4.79167	0.000521469	-0.0119449
4.79583	0.000528794	-0.0120792
4.8	0.000533203	-0.0120733
4.80417	0.000477861	-0.01203
4.80833	0.000452315	-0.0122189
4.8125	0.000465373	-0.0121597
4.81667	0.000484349	-0.0119535
4.82083	0.000468721	-0.0119954
4.825	0.000460918	-0.0122961
4.82917	0.000523861	-0.0124241
4.83333	0.000646916	-0.0123856
4.8375	0.000653793	-0.0123037
4.84167	0.000563989	-0.0123802
4.84583	0.000468015	-0.0124148
4.85	0.000468272	-0.0121637
4.85417	0.000460563	-0.0121886
4.85833	0.000450851	-0.0122427
4.8625	0.000469381	-0.0122373
4.86667	0.000503182	-0.0120678
4.87083	0.000532327	-0.0120522
4.875	0.000533047	-0.0124255
4.87917	0.00053294	-0.012616
4.88333	0.000558589	-0.0124518
4.8875	0.000550074	-0.0122788
4.89167	0.000525694	-0.0124786
4.89583	0.000557651	-0.0126029
4.9	0.000580515	-0.0121499
4.90417	0.000548184	-0.011392
4.90833	0.000527718	-0.011429
4.9125	0.000547907	-0.0120932
4.91667	0.000590838	-0.0122683
4.92083	0.000602226	-0.0122463
4.925	0.000601267	-0.0123482
4.92917	0.000637119	-0.0125842
4.93333	0.000649835	-0.0124557
4.9375	0.000635512	-0.0123052
4.94167	0.000654465	-0.0126244
4.94583	0.000705678	-0.0129543
4.95	0.000763172	-0.0127358
4.95417	0.000732172	-0.0122442
4.95833	0.000667717	-0.0121772
4.9625	0.000662556	-0.0124592
4.96667	0.000692336	-0.0126176
4.97083	0.000702244	-0.0124497
4.975	0.000735083	-0.0125537
4.97917	0.000775557	-0.0126723
4.98333	0.000789658	-0.0125444
4.9875	0.000787831	-0.0122612
4.99167	0.000793096	-0.012163
4.99583	0.000858081	-0.0125542
5	0.000902394	-0.0129246

[truncated: 2 more sheets: S7D, S7F]
